# Supplementary material for: Aerobic oxidation at benzylic positions catalyzed by a simple Pd(OAc)2/bis-triazole system
Source: Royal Society of Chemistry journal article supplement (doi:10.1039/c5ra22251f), 2015-01-01
Supplement: c5ra22251f1.pdf [file c5ra22251f1.pdf]

## Supporting Information

### Aerobic oxidation at benzylic positions catalyzed by a simple Pd(OAc)<sub>2</sub>/bis-triazole system

Garazi Urgoitia, Ainhoa Maiztegi, Raul SanMartin,\* Maria Teresa Herrero and Esther Dominguez\*

Department of Organic Chemistry, University of Basque Country (UPV/EHU), 48940 Leioa, Spain

[raul.sanmartin@ehu.eus](mailto:raul.sanmartin@ehu.eus)

|                                                                                                          |           |
|----------------------------------------------------------------------------------------------------------|-----------|
| <b>1. General remarks.</b>                                                                               | <b>1</b>  |
| <b>2. Synthesis of 2,6-dibromoisonicotinic acid</b>                                                      | <b>2</b>  |
| <b>3. Synthesis of 2,6-bis(3-butylimidazolium-1-yl)isonicotinic acid (L4)</b>                            | <b>2</b>  |
| <b>4. Synthesis of methyl 2,6-bis(bromomethyl)benzoate</b>                                               | <b>2</b>  |
| <b>5. Synthesis of methyl 2,6-bis(pyrazol-1-ylmethyl)benzoate (L5)</b>                                   | <b>2</b>  |
| <b>6. Synthesis of methyl 3,5-bis((1<i>H</i>-1,2,4-triazol-1-yl)methyl)benzoate (L6)</b>                 | <b>3</b>  |
| <b>7. Aerobic oxidation of alcohols in the presence of Pd(OAc)<sub>2</sub> and L6. General procedure</b> | <b>5</b>  |
| <b>8. Benzylic C-H oxidation in the presence of Pd(OAc)<sub>2</sub> and L6. General procedure</b>        | <b>5</b>  |
| <b>9. <sup>1</sup>H-NMR and <sup>13</sup>C-NMR spectra</b>                                               | <b>7</b>  |
| <b>10. References</b>                                                                                    | <b>35</b> |

#### 1. General remarks.

Commercially available reagents were used throughout without purification unless otherwise stated. <sup>1</sup>H and <sup>13</sup>C NMR spectra were recorded on a Bruker AC-300 instrument (300 MHz for <sup>1</sup>H and 75.4 MHz for <sup>13</sup>C) at 20 °C. Chemical shifts (δ) are given in ppm downfield from Me<sub>4</sub>Si and are referenced as internal standard to the residual solvent (unless indicated) CDCl<sub>3</sub> (δ=7.26 for <sup>1</sup>H and δ=77.00 for <sup>13</sup>C). Coupling constants, *J*, are reported in hertz (Hz). Melting points were determined in a capillary tube and are uncorrected. TLC was carried out on SiO<sub>2</sub> (silica gel 60 F254, Merck), and the spots were located with UV light. Flash chromatography was carried out on SiO<sub>2</sub> (silica gel 60, Merck, 230–400 mesh ASTM). IR spectra were recorded on a Perkin–Elmer 1600 FT and JASCO FTIR-4100 infrared spectrophotometer as thin films, and only noteworthy absorptions are reported in cm<sup>-1</sup>. Drying of organic extracts during work-up of reactions was performed over anhydrous Na<sub>2</sub>SO<sub>4</sub>. Evaporation of solvents was accomplished with a Büchi rotatory evaporator. MS and HR-MS were measured using a Waters GCT mass spectrometer.

**2. Synthesis of 2,6-dibromoisonicotinic acid.**<sup>1</sup> A mixture of citrazinic acid (500 mg, 3.22 mmol) and phosphorous(V) oxybromide (1.48 g, 5.16 mmol) were heated at 175 °C under Ar for 5 h. After cooling, H<sub>2</sub>O (50 mL) was added, the aqueous layer was extracted with CH<sub>2</sub>Cl<sub>2</sub> (4 x 20 mL). The combined organic extracts were dried with anhydrous Na<sub>2</sub>SO<sub>4</sub> and the solvent was removed *in vacuo*, obtaining 2,6-dibromoisonicotinic acid as a reddish powder (683 mg, 76%). Mp: 176-178 °C (EtOAc). <sup>1</sup>H-NMR (CDCl<sub>3</sub>) δ<sub>H</sub>: 8.05 (s, 2H, H-3, H-5). <sup>13</sup>C-NMR (CDCl<sub>3</sub>) δ<sub>C</sub>: 127.2 (C-3, C-5), 140.6 (C-2, C-6), 142.0 (C-4), 166.8 (COOH). IR (film) ν<sub>max</sub>: 3072, 2890, 2579, 1725, 1531. HRMS: calculated for C<sub>6</sub>H<sub>4</sub>NO<sub>2</sub>Br<sub>2</sub>: 279.8609, found 279.8617.

**3. Synthesis of 3,3'-(4-carboxy-2,6-pyridinediyl)-bis[1-butyl-1H-imidazolium] dibromide (L4).**<sup>2</sup> A solution of 2,6-dibromoisonicotinic acid (600 mg, 2.14 mmol) and 1-butylimidazole **L1** (665 mg, 5.36 mmol) was stirred at 150 °C in a sealed tube for 24 h. After cooling, CH<sub>2</sub>Cl<sub>2</sub> (15 mL) and Et<sub>2</sub>O (4 mL) were added to the mixture. The resultant precipitate was collected and purified by crystallization from MeOH:Et<sub>2</sub>O to afford 3,3'-(4-carboxy-2,6-pyridinediyl)-bis[1-butyl-1H-imidazolium] dibromide as a brown powder (1,05 g, 93%). Mp: >300 °C (EtOAc). <sup>1</sup>H-NMR (MeOH-*d*<sub>4</sub>) δ<sub>H</sub>: 0.93 (t, 6H, *J* = 7.3, CH<sub>3</sub>), 1.30-1.38 (m, 4H, NCH<sub>2</sub>CH<sub>2</sub>CH<sub>2</sub>CH<sub>3</sub>), 1.88-1.97 (m, 4H, NCH<sub>2</sub>CH<sub>2</sub>CH<sub>2</sub>CH<sub>3</sub>), 4.30 (t, 4H, *J* = 7.3, NCH<sub>2</sub>), 8.12 (s, 2H, H-4'), 8.47 (s, 2H, H-3, H-5), 8.87 (s, 2H, H-5'), 10.53 (s, 1H, H-2'). <sup>13</sup>C-NMR (MeOH-*d*<sub>4</sub>) δ<sub>C</sub>: 13.4 (CH<sub>3</sub>), 18.9 (NCH<sub>2</sub>CH<sub>2</sub>CH<sub>2</sub>CH<sub>3</sub>), 31.1 (NCH<sub>2</sub>CH<sub>2</sub>CH<sub>2</sub>CH<sub>3</sub>), 49.5 (NCH<sub>2</sub>), 113.6 (C-3, C-5), 119.5 (C-5'), 123.7 (C-4'), 136.3 (C-2'), 145.2 (C-4), 159.1 (C-2, C-6), 163.3 (COOH). IR (film) ν<sub>max</sub>: 2359, 1533, 1220. HRMS: Calculated for: C<sub>20</sub>H<sub>27</sub>Br<sub>2</sub>N<sub>5</sub>O<sub>2</sub> 527.0531, found: 527.0531.

**4. Synthesis of methyl 2,6-bis(bromomethyl)benzoate.**<sup>3</sup> NBS (13 g, 73.08 mmol) was added in four equal portions during 31 h to a solution of methyl 3,5-dimethylbenzoate (1.5 g, 9.13 mmol) in refluxing CCl<sub>4</sub> (55.5 mL), each addition being followed by a few milligrams of benzoyl peroxide. The reaction outcome was monitored by <sup>1</sup>H-NMR. Upon completion, the mixture was cooled to room temperature and filtered. The filtrate was washed with a saturated aqueous solution of NaHCO<sub>3</sub> (30 mL) and brine (30 mL), dried over anhydrous Na<sub>2</sub>SO<sub>4</sub>, and evaporated *in vacuo*. The residue was dissolved in anhydrous THF (20 mL), and diethyl phosphate (13.8 mL, 1.07 mmol) and *i*Pr<sub>2</sub>NEt (18.6 mL, 1.07 mmol) were added at 0 °C under Ar. The stirred mixture was allowed to warm to room temperature and stirred for 2 days (the reaction was monitored by <sup>1</sup>H-NMR), and then poured onto ice/water and extracted with Et<sub>2</sub>O (4 x 30 mL). The organic layers were washed with 1M HCl (1 x 10 mL) and brine (1 x 10 mL), dried over anhydrous Na<sub>2</sub>SO<sub>4</sub>, and evaporated *in vacuo* to give a residue which was purified by flash chromatography on silicagel using Et<sub>2</sub>O as eluent. Methyl 3,5-bis(bromomethyl)benzoate was obtained as a yellow powder (1.46 g, 68%). Mp: 95-97 °C (EtOAc). <sup>1</sup>H-NMR (CDCl<sub>3</sub>) δ<sub>H</sub>: 3.86 (s, 3H, CH<sub>3</sub>), 4.44 (s, 4H, CH<sub>2</sub>), 7.56 (s, 1H, H-1), 7.94 (d, 2H, *J* = 1.6, H-3, H-5). <sup>13</sup>C-NMR (CDCl<sub>3</sub>) δ<sub>C</sub>: 31.8 (CH<sub>3</sub>), 52.4 (CH<sub>2</sub>), 129.9 (C-3, C-5), 131.4 (C-4), 133.8 (C-1), 138.9 (C-2, C-6), 165.9 (CO). IR (film) ν<sub>max</sub>: 1728, 1604, 1436, 1318, 1231, 1108, 1026.

**5. Synthesis of methyl 2,6-bis(pyrazol-1-ylmethyl)benzoate (L5).**<sup>4</sup> A mixture of methyl 2,6-bis(bromomethyl)benzoate (600 mg, 1.86 mmol), pyrazole **L2** (2.79 mg, 4.09 mmol), and Cs<sub>2</sub>CO<sub>3</sub> (2.37 g, 7.27 mmol) was refluxed in dry acetonitrile (45 mL) under argon for 2 h. After cooling, the resultant solution was filtered and water (30 mL) was added. The aqueous layer was extracted with EtOAc (2 x 40 mL). The combined organic extracts were dried over anhydrous Na<sub>2</sub>SO<sub>4</sub> and the solvent was removed *in vacuo* to give a residue which was purified by gradient flash chromatography on silicagel (Hexane:EtOAc 7:3 → EtOAc → EtOAc:MeOH 9.5:0.5). Methyl 2,6-bis(pyrazol-1-ylmethyl)benzoate was obtained as a white powder (570 mg, 99%). Mp: 62-63 °C (Hexane: EtOAc). <sup>1</sup>H-NMR (CDCl<sub>3</sub>) δ<sub>H</sub>: 3.84 (s, 3H, CH<sub>3</sub>), 5.29 (s, 4H, CH<sub>2</sub>), 6.25 (s, 2H, H-4'), 7.17 (s, 1H, H-1), 7.36 (d, 2H, *J* = 1.4, H-3'), 7.51 (d, 2H, *J* = 2.0, H-3, H-5), 7.77 (s, 2H, H-5'). <sup>13</sup>C-NMR (CDCl<sub>3</sub>) δ<sub>C</sub>: 52.3 (CH<sub>3</sub>), 55.2 (CH<sub>2</sub>), 106.3 (C-4'), 128.3 (C-3, C-5), 129.5 (C-5'), 131.1 (C-4), 131.3 (C-1), 137.9 (C-2, C-6), 139.9 (C-3'), 166.2 (CO). IR (film) ν<sub>max</sub>: 1720, 1428, 1303, 1213, 772 HRMS: Calculated for C<sub>16</sub>H<sub>16</sub>N<sub>4</sub>O<sub>2</sub> 296.1273, found: 296.1275

**6. Synthesis of methyl 3,5-bis((1*H*-1,2,4-triazol-1-yl)methyl)benzoate (L6).**<sup>5</sup> A mixture of methyl 3,5-bis(bromomethyl)benzoate (600 mg, 1.86 mmol), 1*H*-1,2,4-triazole **L3** (283 mg, 4.09 mmol) and Cs<sub>2</sub>CO<sub>3</sub> (2.37 mg, 7.27 mmol) was refluxed in dry acetonitrile (45 mL) under Ar for 3 h. After cooling, the resultant solution was filtered and water (30 mL) was added. The aqueous layer was extracted with EtOAc (3 X 40 mL). The combined organic extracts were dried with anhydrous Na<sub>2</sub>CO<sub>3</sub> and the solvent was removed *in vacuo* to give a residue which was purified by silica gel chromatography eluting with hexane/EtOAc 7/3 → EtOAc → EtOAc/MeOH 9.5/0.5 to afford methyl 3,5-bis((1*H*-1,2,4-triazol-1-yl)methyl)benzoate **3** as a yellowish powder (510 mg, 92%). Mp: 105-107 °C (EtOAc). <sup>1</sup>H-NMR (CDCl<sub>3</sub>) δ<sub>H</sub> (ppm): 3.89 (3H, s, CH<sub>3</sub>), 5.50 (4H, s, CH<sub>2</sub>), 7.51 (1H, s, H-2), 7.92 (2H, s, H-4, H-6), 8.00 (2H, s, H-3'), 8.59 (2H, s, H-5'); <sup>13</sup>C-NMR (CDCl<sub>3</sub>) δ<sub>C</sub> (ppm): 53.9 (CH<sub>2</sub>), 123.9 (C-4'), 128.6 (C-5, C-2), 130.2 (C-4, C-6), 134.2 (C-5'), 135.7 (C-1, C-2); IR (film) ν<sub>max</sub>(cm<sup>-1</sup>): 1716, 1508, 1428, 1314, 1213, 1142, 1020. HR-MS: Calculated for C<sub>14</sub>H<sub>14</sub>N<sub>6</sub>O<sub>2</sub> 299.1256, found 299.1248.

**7. Aerobic oxidation of alcohols in the presence of Pd(OAc)<sub>2</sub> and L6. General procedure.** A round bottom flask equipped with a magnetic stirrer bar was charged with the alcohol (1 mmol), NaOAc (8.0 mg, 0.1 mmol), Pd(OAc)<sub>2</sub> (20 μL of a 5 x 10<sup>-6</sup>M solution in PEG-400, 10<sup>-7</sup> mmol), L6 (20 μL of a 5 x 10<sup>-6</sup>M solution in PEG-400, 10<sup>-7</sup> mmol) and PEG 400 (1 mL) at room temperature. The system was purged with molecular oxygen, and an oxygen-filled balloon (1-1.2 atm) was connected. The mixture was heated at 120 °C under stirring for 48 h. The reaction outcome was monitored by <sup>1</sup>H-NMR. Upon completion, the mixture was cooled to room temperature and water was added (50 mL aprox.). The resulting solution was acidified with HCl 1M (pH≈1-2) and extracted with Et<sub>2</sub>O (4 x 6 mL) and the combined organic layers were washed with brine, dried over anhydrous Na<sub>2</sub>SO<sub>4</sub> and evaporated *in vacuo* to give a residue which was purified by flash column chromatography using hexane:ethyl acetate as eluent. By this procedure the following ketones and acids were prepared:

**Acetophenone.**<sup>6</sup> (119 mg, 99%) <sup>1</sup>H-NMR (CDCl<sub>3</sub>) δ<sub>H</sub>: 2.61 (s, 3H, CH<sub>3</sub>), 7.42-7.63 (m, 3H, H<sub>arom</sub>), 7.96 (t, *J* = 8, 2H, H<sub>arom</sub>); <sup>13</sup>C-NMR (CDCl<sub>3</sub>) δ<sub>C</sub>: 26.5 (CH<sub>3</sub>), 128.2 (C<sub>arom-H</sub>), 128.5 (C<sub>arom-H</sub>), 133.0 (C<sub>arom</sub>), 137.07 (C<sub>q-arom</sub>), 198.1 (CO); LRMS (*m/z*): 120.1 (M<sup>+</sup>).

**1-Phenyl-1-propanone.**<sup>7</sup> (122 mg, 91%) <sup>1</sup>H-NMR (CDCl<sub>3</sub>) δ<sub>H</sub>: 1.22 (t, 3H, *J* = 7.2, CH<sub>3</sub>), 3.0 (q, 2H, *J* = 7.3, CH<sub>2</sub>), 7.45 (t, 2H, *J* = 6.9, H<sub>arom</sub>), 7.54 (t, 1H, *J* = 6.6, H<sub>arom</sub>), 7.96 (d, 2H, *J* = 8.3, H<sub>arom</sub>); <sup>13</sup>C-NMR (CDCl<sub>3</sub>) δ<sub>C</sub>: 8.2 (CH<sub>3</sub>), 31.8 (CH<sub>2</sub>), 127.9 (C<sub>arom-H</sub>), 128.6 (C<sub>arom-H</sub>), 132.9 (C<sub>arom-H</sub>), 133.9 (C<sub>q-arom</sub>), 200.8 (CO); LRMS (*m/z*): 134.1 (M<sup>+</sup>).

**2,2-Dimethyl-1-phenylpropanone.**<sup>7</sup> (159 mg, 98%) <sup>1</sup>H-NMR (CDCl<sub>3</sub>) δ<sub>H</sub>: 1.35 (s, 9H, CH<sub>3</sub>), 7.30 (dd, 2H, *J* = 5.0, 2.3, H<sub>arom</sub>), 7.44 (dd, 1H, *J* = 5.1, 1.5, H<sub>arom</sub>), 7.66-7.72 (m, 2H, H<sub>arom</sub>); <sup>13</sup>C-NMR (CDCl<sub>3</sub>) δ<sub>C</sub>: 28.0 (CH<sub>3</sub>), 44.2 (C<sub>q</sub>), 127.7 (C<sub>arom-H</sub>), 127.8 (C<sub>arom-H</sub>), 128.0 (C<sub>arom-H</sub>), 130.8 (C<sub>arom-H</sub>), 160.4 (C<sub>q-arom</sub>), 209.3 (CO); LRMS (*m/z*): 162.1 (M<sup>+</sup>).

**Benzoylcyanide.**<sup>8</sup> (71 mg, 54%) <sup>1</sup>H-NMR (CDCl<sub>3</sub>) δ<sub>H</sub>: 7.47 (m, 2H, H<sub>arom</sub>), 7.59 (m, 1H, H<sub>arom</sub>), 8.13 (m, 2H, H<sub>arom</sub>); <sup>13</sup>C-NMR (CDCl<sub>3</sub>) δ<sub>C</sub>: 115.2 (CN), 127.2 (C<sub>arom-H</sub>), 128.5 (C<sub>arom-H</sub>), 135.0 (C<sub>arom-H</sub>), 140.1 (C<sub>q-arom</sub>), 199.1 (CO); LRMS (*m/z*): 131.1 (M<sup>+</sup>).

**2-Oxo-phenylacetic acid.**<sup>9</sup> (129 mg, 86%) <sup>1</sup>H-NMR (CDCl<sub>3</sub>) δ<sub>H</sub>: 7.55 (t, 2H, *J* = 7.8, H<sub>arom</sub>), 7.72 (d, 1H, *J* = 7.6, H<sub>arom</sub>), 7.8.35 (d, 2H, *J* = 7.6, H<sub>arom</sub>); <sup>13</sup>C-NMR (CDCl<sub>3</sub>) δ<sub>C</sub>: 128.3 (C<sub>arom-H</sub>), 129.2 (C<sub>arom-H</sub>), 130.0 (C<sub>arom-H</sub>), 133.6 (C<sub>q-arom</sub>), 160.9 (COOH), 171.6 (CO); LRMS (m/z): 150.1 (M<sup>+</sup>).

**1-(2-Methoxyphenyl)ethanone.**<sup>10</sup> (132 mg, 88%) <sup>1</sup>H-NMR (CDCl<sub>3</sub>) δ<sub>H</sub>: 2.60 (s, 3H, CH<sub>3</sub>), 3.89 (s, 3H, OCH<sub>3</sub>), 6.91-7.03 (m, 2H, H<sub>arom</sub>), 7.44 (t, 1H, *J* = 9.2, H<sub>arom</sub>), 7.71 (d, 1H, *J* = 7.7, CH<sub>arom</sub>); <sup>13</sup>C-NMR (CDCl<sub>3</sub>) δ<sub>C</sub>: 31.7 (CH<sub>3</sub>), 55.4 (OCH<sub>3</sub>), 111.5 (C<sub>arom-H</sub>), 120.5 (C<sub>arom-H</sub>), 126.3 (C<sub>q-arom</sub>), 130.3 (C<sub>arom-H</sub>), 133.6 (C<sub>arom-H</sub>), 158.8 (C<sub>q-arom</sub>), 199.8 (CO); LRMS (m/z): 150.1 (M<sup>+</sup>).

**1-(*p*-Tolyl)ethanone .**<sup>8</sup> (114 mg, 85%) <sup>1</sup>H-NMR (CDCl<sub>3</sub>) δ<sub>H</sub>: 2.39 (s, 3H, CH<sub>3</sub>), 2.55 (s, 3H, CH<sub>3</sub>), 7.24 (d, 2H, *J* = 8.2, H<sub>arom</sub>), 7.84 (d, 2H, *J* = 8.2, H<sub>arom</sub>); <sup>13</sup>C-NMR (CDCl<sub>3</sub>) δ<sub>C</sub>: 21.6 (CH<sub>3</sub>), 26.5 (CH<sub>3</sub>), 128.5 (C<sub>arom-H</sub>), 129.2 (C<sub>arom-H</sub>), 134.7 (C<sub>q-arom</sub>), 143.8 (C<sub>q-arom</sub>), 197.8 (CO); LRMS (m/z): 134.1 (M<sup>+</sup>).

**4-Chloroacetophenone.**<sup>11</sup> (129 mg, 84%) <sup>1</sup>H-NMR (CDCl<sub>3</sub>) δ<sub>H</sub>: 2.58 (s, 3H, CH<sub>3</sub>), 7.43 (d, 2H, *J* = 8.8, H<sub>arom</sub>), 7.89 (d, 2H, *J* = 8.8, H<sub>arom</sub>); <sup>13</sup>C-NMR (CDCl<sub>3</sub>) δ<sub>C</sub> (ppm): 26.5 (CH<sub>3</sub>), 128.9 (C<sub>arom-H</sub>), 129.7 (C<sub>arom-H</sub>), 135.4 (C<sub>q-arom</sub>), 139.6 (C<sub>q-arom</sub>), 196.8 (CO); LRMS (m/z): 154.1 (M<sup>+</sup>).

**Indanone.**<sup>7</sup> (128 mg, 97%) <sup>1</sup>H-NMR (CDCl<sub>3</sub>) δ<sub>H</sub>: 2.67 (t, 2H, *J* = 5.8, CH<sub>2</sub>), 3.13 (t, 2H, *J* = 5.3, CH<sub>2</sub>), 7.37 (t, 1H, *J* = 7.5, H<sub>arom</sub>), 7.48 (d, 1H, *J* = 7.5, H<sub>arom</sub>), 7.59 (t, 1H, *J* = 7.5, H<sub>arom</sub>), 7.76 (d, 1H, *J* = 7.5, H<sub>arom</sub>); <sup>13</sup>C-NMR (CDCl<sub>3</sub>) δ<sub>C</sub>: 25.8 (CH<sub>2</sub>), 36.2 (CH<sub>2</sub>), 123.7 (C<sub>arom-H</sub>), 126.7 (C<sub>arom-H</sub>), 127.3 (C<sub>arom-H</sub>), 134.6 (C<sub>arom-H</sub>), 137.1 (C<sub>q-arom</sub>), 155.2 (C<sub>q-arom</sub>), 207.1 (CO); LRMS (m/z): 132.1 (M<sup>+</sup>).

**Fluorenone.**<sup>12</sup> (169 mg, 94%) <sup>1</sup>H-NMR (CDCl<sub>3</sub>) δ<sub>H</sub>: 7.20-7.25 (m, 2H, H<sub>arom</sub>), 7.36-7.44 (m, 4H, H<sub>arom</sub>), 7.59 (dd, 2H, *J* = 0.8, 7.4, H<sub>arom</sub>); <sup>13</sup>C-NMR (CDCl<sub>3</sub>) δ<sub>C</sub>: 120.1 (C), 124.0 (C<sub>arom-H</sub>), 128.8 (C<sub>arom-H</sub>), 133.9 (C<sub>q-arom</sub>), 134.5 (C<sub>arom-H</sub>), 144.18 (C<sub>q-arom</sub>), 193.7 (CO); LRMS (m/z): 180.2 (M<sup>+</sup>).

**Xanthenone.**<sup>8</sup> (176 mg, 90%) <sup>1</sup>H-NMR (CDCl<sub>3</sub>) δ<sub>H</sub>: 7.31 (t, 2H, *J* = 7.2, H<sub>arom</sub>), 7.41 (d, 2H, *J* = 8.4, H<sub>arom</sub>), 7.65 (t, 2H, *J* = 6.9, H<sub>arom</sub>), 8.27 (d, 2H, *J* = 9.7, H<sub>arom</sub>); <sup>13</sup>C-NMR (CDCl<sub>3</sub>) δ<sub>C</sub>: 117.9 (C<sub>arom-H</sub>), 121.7 (C<sub>arom-H</sub>), 123.9 (C<sub>arom-H</sub>), 126.6 (C<sub>arom-H</sub>), 134.8 (C<sub>arom-H</sub>), 156.1 (C<sub>q-arom</sub>), 177.2 (CO); LRMS (m/z): 196.1 (M<sup>+</sup>).

**Benzophenone**<sup>7</sup> (166 mg, 91%) <sup>1</sup>H-NMR (CDCl<sub>3</sub>) δ<sub>H</sub>: 7.42-7.52 (m, 4H, H<sub>arom</sub>), 7.54-7.62 (m, 2H, H<sub>arom</sub>), 7.79-7.82 (m, 4H, H<sub>arom</sub>); <sup>13</sup>C-NMR (CDCl<sub>3</sub>) δ<sub>C</sub>: 128.2 (C<sub>arom</sub>), 129.94 (C<sub>arom</sub>), 132.3 (C<sub>arom</sub>), 132.5 (C<sub>q-arom</sub>), 196.6 (CO); LRMS (m/z): 182.1 (M<sup>+</sup>).

**2-Methylbenzophenone.**<sup>13</sup> (145 mg, 74%) <sup>1</sup>H-NMR (CDCl<sub>3</sub>) δ<sub>H</sub>: 2.34 (s, 3H, CH<sub>3</sub>), 7.25-7.33 (m, 3H, H<sub>arom</sub>), 7.38 (d, 1H, *J* = 7.5, H<sub>arom</sub>), 7.45 (t, 2H, *J* = 7.5, H<sub>arom</sub>), 7.58 (t, 1H, *J* = 8, H<sub>arom</sub>), 7.81 (d, 2H, *J* = 8.3Hz, H<sub>arom</sub>); <sup>13</sup>C-NMR (CDCl<sub>3</sub>) δ<sub>C</sub>: 19.9 (CH<sub>3</sub>); 125.2 (C<sub>arom-H</sub>), 128.5 (C<sub>arom-H</sub>), 130.1 (C<sub>arom-H</sub>), 131.0 (C<sub>arom-H</sub>), 133.1 (C<sub>arom-H</sub>), 136.7 (C<sub>q-arom</sub>), 137.8 (C<sub>q-arom</sub>), 138.6 (C<sub>q-arom</sub>), 198.6 (CO); LRMS (m/z): 196.2 (M<sup>+</sup>).

**Benzil.**<sup>14</sup> (from benzoin 204 mg, 97%; from hydrobenzoin 199 mg, 95%) <sup>1</sup>H-NMR (CDCl<sub>3</sub>) δ<sub>H</sub>: 7.50-7.56 (m, 4H, H<sub>arom</sub>), 7.64-7.70 (m, 2H, H<sub>arom</sub>), 7.94-8.01 (m, 4H, H<sub>arom</sub>); <sup>13</sup>C-NMR (CDCl<sub>3</sub>) δ<sub>C</sub>: 129.0 (C<sub>arom-H</sub>), 129.9 (C<sub>arom-H</sub>), 133.0 (C<sub>q-arom</sub>), 134.9 (C<sub>arom-H</sub>), 194.6 (CO); LRMS (m/z): 210.1 (M<sup>+</sup>).

**Desoxybenzoin.**<sup>15</sup> (184 mg, 94%) <sup>1</sup>H-NMR (CDCl<sub>3</sub>) δ<sub>H</sub>: 4.30 (s, 2H, CH<sub>2</sub>), 7.24-7.29 (m, 3H, H<sub>arom</sub>), 7.32-7.36 (m, 2H, H<sub>arom</sub>), 7.45-7.49 (m, 2H, H<sub>arom</sub>), 7.55-7.59 (m, 2H, H<sub>arom</sub>), 8.02-8.05 (m, 2H, H<sub>arom</sub>); <sup>13</sup>C-NMR (CDCl<sub>3</sub>) δ<sub>C</sub>: 45.5 (CH<sub>2</sub>), 126.9 (C<sub>arom-H</sub>), 126.9 (C<sub>arom-H</sub>), 128.5 (C<sub>q-arom</sub>), 128.6 (C<sub>arom-H</sub>), 128.6 (C<sub>arom-H</sub>), 128.7 (C<sub>arom-H</sub>), 129.5 (C<sub>arom-H</sub>), 133.17 (C<sub>arom-H</sub>), 134.5 (C<sub>q-arom</sub>), 136.6 (C<sub>q-arom</sub>), 197.6 (CO); LRMS (m/z): 196.1 (M<sup>+</sup>).

**Benzoic acid.**<sup>16</sup> (101 mg, 83%) <sup>1</sup>H-NMR (CDCl<sub>3</sub>) δ<sub>H</sub>: 7.49 (t, 2H, *J* = 7.5, H<sub>arom</sub>), 7.63 (t, 1H, *J* = 6.8, H<sub>arom</sub>), 8.15 (d, 2H, *J* = 8.4, H<sub>arom</sub>); <sup>13</sup>C-NMR (CDCl<sub>3</sub>) δ<sub>C</sub>: 128.4 (C<sub>arom-H</sub>), 129.6 (C<sub>q-arom</sub>), 130.1 (C<sub>arom-H</sub>), 133.7 (C<sub>arom-H</sub>), 172.1 (COOH); LRMS (m/z): 122.1 (M<sup>+</sup>).

**4-Isopropylbenzoic acid.**<sup>17</sup> (154 mg, 94%) <sup>1</sup>H-NMR (CDCl<sub>3</sub>) δ<sub>H</sub>: 1.29 (d, 6H, *J* = 6.9, CH<sub>3</sub>), 2.99 (q, 1H, *J* = 6.9, CH), 7.34 (d, 2H, *J* = 8.4, H<sub>arom</sub>), 8.06 (d, 2H, *J* = 8.3, H<sub>arom</sub>); <sup>13</sup>C-NMR (CDCl<sub>3</sub>) δ<sub>C</sub>: 23.7 (CH<sub>3</sub>), 34.2 (CH), 126.6 (C<sub>arom-H</sub>), 126.9 (C<sub>q-arom</sub>), 130.4 (C<sub>arom-H</sub>), 155.3 (C<sub>q-arom</sub>), 172.4 (COOH); LRMS (m/z): 164.1 (M<sup>+</sup>).

**4-Ethylbenzoic acid.**<sup>16</sup> (129 mg, 86%) <sup>1</sup>H-NMR (CDCl<sub>3</sub>) δ<sub>H</sub>: 1.28 (t, 3H, *J* = 7.3, CH<sub>3</sub>), 2.73 (q, 2H, *J* = 7.3, CH<sub>2</sub>), 7.31 (d, 2H, *J* = 8.1, H<sub>arom</sub>), 8.05 (d, 2H, *J* = 8.3, H<sub>arom</sub>); <sup>13</sup>C-NMR (CDCl<sub>3</sub>) δ<sub>C</sub>: 15.1 (CH<sub>3</sub>), 29.0 (CH<sub>2</sub>), 126.8 (C<sub>q-arom</sub>), 128.0 (C<sub>arom-H</sub>), 130.4 (C<sub>arom-H</sub>), 150.8 (C<sub>q-arom</sub>), 172.4 (COOH); LRMS (m/z): 150.1 (M<sup>+</sup>).

**4-Methylbenzoic acid.**<sup>16</sup> (113 mg, 83%) <sup>1</sup>H-NMR (CDCl<sub>3</sub>) δ<sub>H</sub>: 2.44 (s, 3H, CH<sub>3</sub>), 7.28 (d, 2H, *J* = 8.4, H<sub>arom</sub>), 8.02 (d, 2H, *J* = 8.2, H<sub>arom</sub>); <sup>13</sup>C-NMR (CDCl<sub>3</sub>) δ<sub>C</sub>: 21.7 (CH<sub>3</sub>), 127.1 (C<sub>q-arom</sub>), 129.1 (C<sub>arom-H</sub>), 130.2 (C<sub>arom-H</sub>), 144.6 (C<sub>q-arom</sub>), 172.2 (COOH); LRMS (m/z): 136.1 (M<sup>+</sup>).

**4-(Trifluoromethyl)benzoic acid.**<sup>18</sup> (144 mg, 76%) <sup>1</sup>H-NMR (CDCl<sub>3</sub>) δ<sub>H</sub>: 7.70 (d, 2H, *J* = 7.7, H<sub>arom</sub>), 8.16 (d, 2H, *J* = 7.3, H<sub>arom</sub>); <sup>13</sup>C-NMR (CDCl<sub>3</sub>) δ<sub>C</sub>: 123.2 (d, *J* = 272, CF<sub>3</sub>), 127.4 (d, *J* = 3.7, C<sub>arom-H</sub>), 132.1 (C<sub>arom-H</sub>), 135.5 (d, *J* = 32.8, C<sub>q-arom</sub>), 136.2 (C<sub>q-arom</sub>), 168.6 (COOH); LRMS (m/z): 190.0 (M<sup>+</sup>).

**3-Phenoxybenzoic acid.**<sup>18</sup> (175 mg, 82%) <sup>1</sup>H-NMR (CDCl<sub>3</sub>) δ<sub>H</sub>: 7.03 (2H, d, *J* = 7.7, H<sub>arom</sub>), 7.15 (1H, t, *J* = 7.3, H<sub>arom</sub>), 7.26 (1H, t, *J* = 3.8, H<sub>arom</sub>), 7.38 (3H, dd, *J* = 13.3, 5.6, H<sub>arom</sub>), 7.44 (1H, d, *J* = 8, H<sub>arom</sub>), 7.71 (1H, s, H<sub>arom</sub>), 7.84 (1H, d, *J* = 7.7, H<sub>arom</sub>); <sup>13</sup>C-NMR (CDCl<sub>3</sub>) δ<sub>C</sub>: 119.2 (C<sub>arom-H</sub>), 119.8 (C<sub>arom-H</sub>), 123.9 (C<sub>arom-H</sub>), 124.8 (C<sub>arom-H</sub>), 129.9 (C<sub>arom-H</sub>), 131.0 (C<sub>q-arom</sub>), 156.5 (C<sub>arom-H</sub>), 157.6 (C<sub>arom-H</sub>), 160.5 (C<sub>q-arom</sub>), 160.9 (C<sub>q-arom</sub>), 171.0 (COOH); LRMS (m/z): 214.0 (M<sup>+</sup>).

**3-Methoxybenzoic acid.**<sup>19</sup> (138 mg, 91%) <sup>1</sup>H-NMR (CDCl<sub>3</sub>) δ<sub>H</sub>: 3.86 (s, 3H, OCH<sub>3</sub>), 7.15 (dd, 1H, *J* = 7.4, 1.8, H<sub>arom</sub>), 7.37 (t, 1H, *J* = 8.0, H<sub>arom</sub>), 7.62 (s, 1H, H<sub>arom</sub>), 7.72 (d, 1H, *J* = 7.6, H<sub>arom</sub>); <sup>13</sup>C-NMR (CDCl<sub>3</sub>) δ<sub>C</sub>: 55.4 (OCH<sub>3</sub>), 114.4 (C<sub>arom-H</sub>), 120.4 (C<sub>arom-H</sub>), 122.7 (C<sub>arom-H</sub>), 129.5 (C<sub>arom-H</sub>), 130.6 (C<sub>q-arom</sub>), 159.6 (C<sub>q-arom</sub>), 172.1 (COOH); LRMS (m/z): 152.0 (M<sup>+</sup>).

**8. Benzylic C-H oxidation in the presence of Pd(OAc)<sub>2</sub> and L6. General procedure.** A round bottom flask equipped with a magnetic stirrer bar was charged with the methylene compound (1 mmol), NaOAc (8.0 mg, 0.1 mmol), Pd(OAc)<sub>2</sub> (20 μL of a 5 x 10<sup>-6</sup>M solution in PEG-400, 10<sup>-7</sup> mmol), **6** (20 μL of a 5 x 10<sup>-6</sup>M solution in PEG-400, 10<sup>-7</sup> mmol) and PEG 400 (1 mL) at room temperature. The system was purged with molecular oxygen, and an oxygen-filled balloon (1-1.2 atm) was connected. The mixture was heated at 120 °C under stirring for 48 h. The reaction outcome was monitored by <sup>1</sup>H-NMR. Upon completion, the mixture was cooled to room temperature and water was added (50 mL approx.). The resulting solution was acidified with HCl 1M (pH≈1-2) and extracted with Et<sub>2</sub>O (4 x 6 mL) and the combined organic layers were washed with brine, dried over anhydrous Na<sub>2</sub>SO<sub>4</sub> and evaporated *in vacuo* to give a residue which was purified by flash column chromatography using hexane:ethyl acetate as eluent. By this procedure the following ketones were prepared:

**Acetophenone.**<sup>6</sup> (114 mg, 95%)

**Benzil.**<sup>12</sup> (204 mg, 97%)

**Xanthenone.**<sup>8</sup> (190 mg, 97%)

**Fluorenone.**<sup>8</sup> (175 mg, 97%)

**Anthraquinone.**<sup>9</sup> (185 mg, 89%) <sup>1</sup>H-NMR (CDCl<sub>3</sub>) δ<sub>H</sub>: 7.79-7.82 (m, 2H, CH<sub>arom</sub>), 8.30-8.33 (m, 2H, CH<sub>arom</sub>); <sup>13</sup>C-NMR (CDCl<sub>3</sub>) δ<sub>C</sub>: 127.2 (C<sub>arom-H</sub>), 133.5 (C<sub>q-arom</sub>), 134.4 (C<sub>arom-H</sub>), 183.2 (CO); LSMR (m/z): 208.1 (M<sup>+</sup>).

**Benzophenone.**<sup>7</sup> (175 mg, 96%)

## 9. $^1\text{H}$ -NMR and $^{13}\text{C}$ -NMR spectra

### 2,6-Dibromoisonicotinic acid

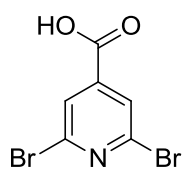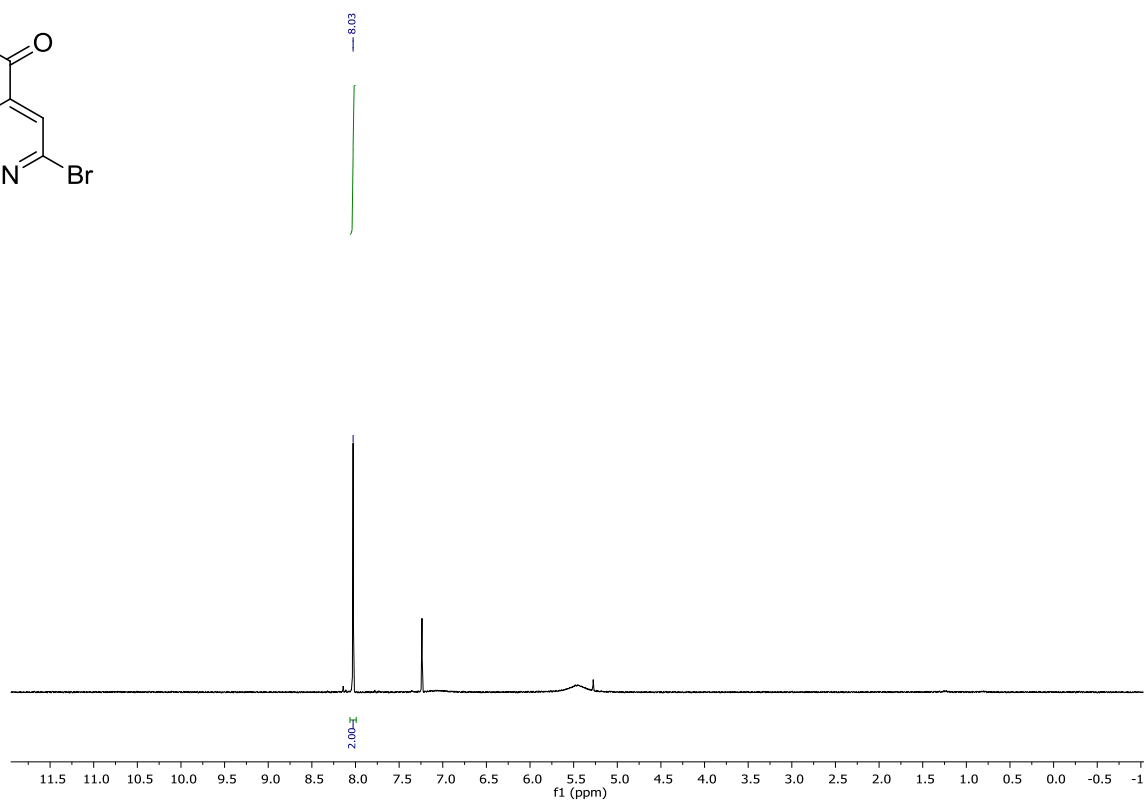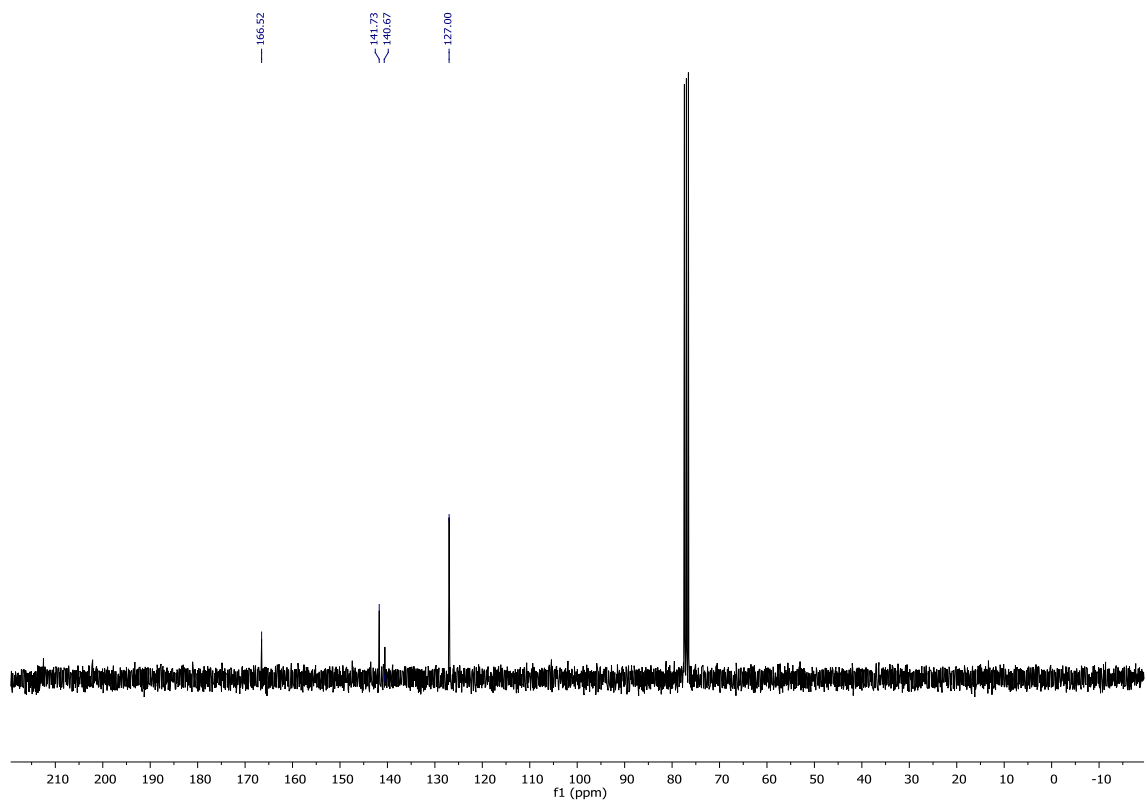

# 3,3'-(4-Carboxy-2,6-pyridinediyl)-bis[1-butyl-1H-imidazolium] dibromide (**L4**)

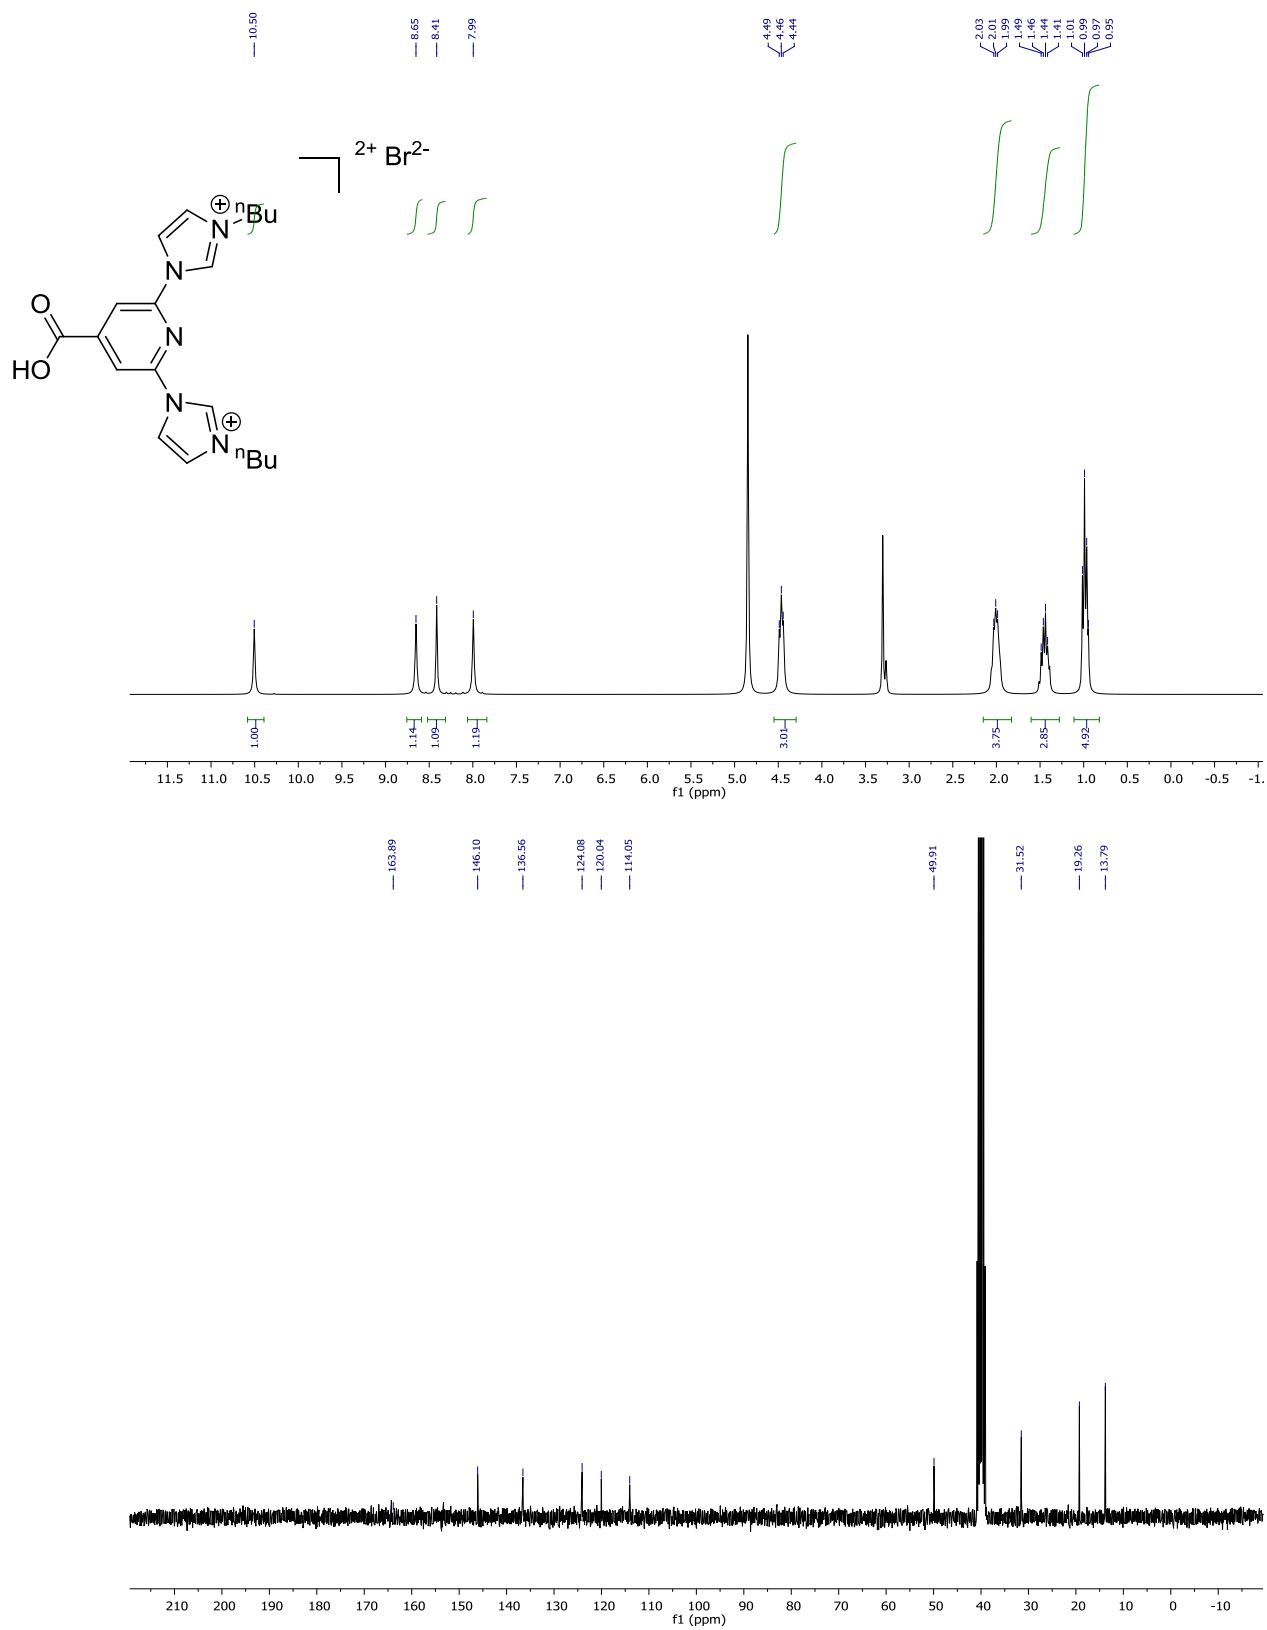



- Methyl 2,6-bis(bromomethyl)benzoate.

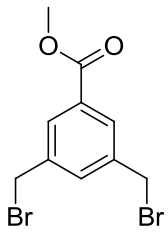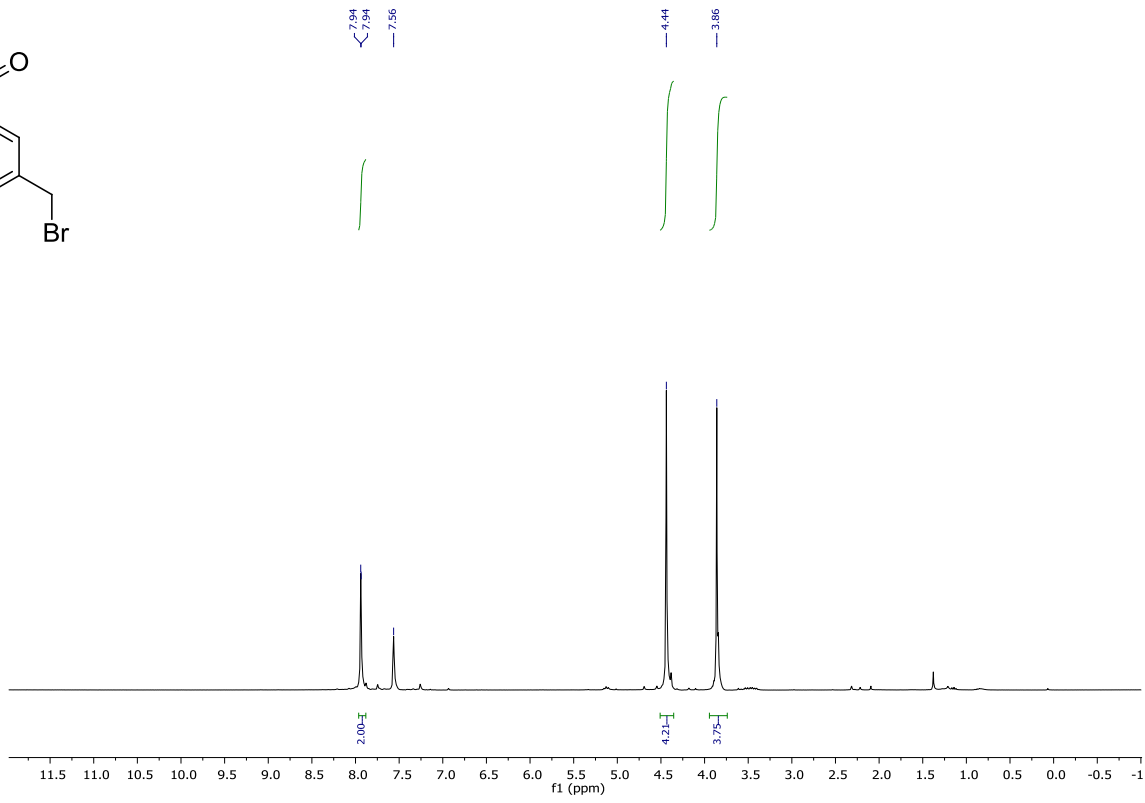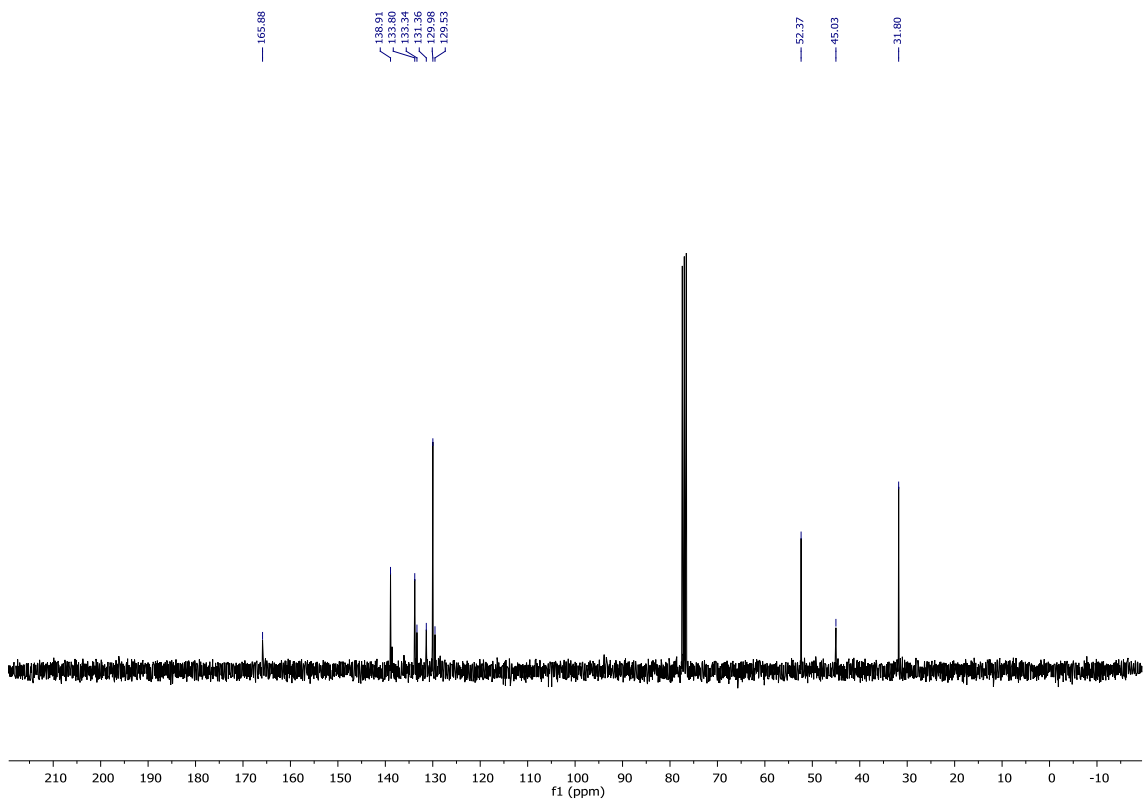

- Methyl 2,6-bis(pyrazol-1-ylmethyl)benzoate (**L5**).

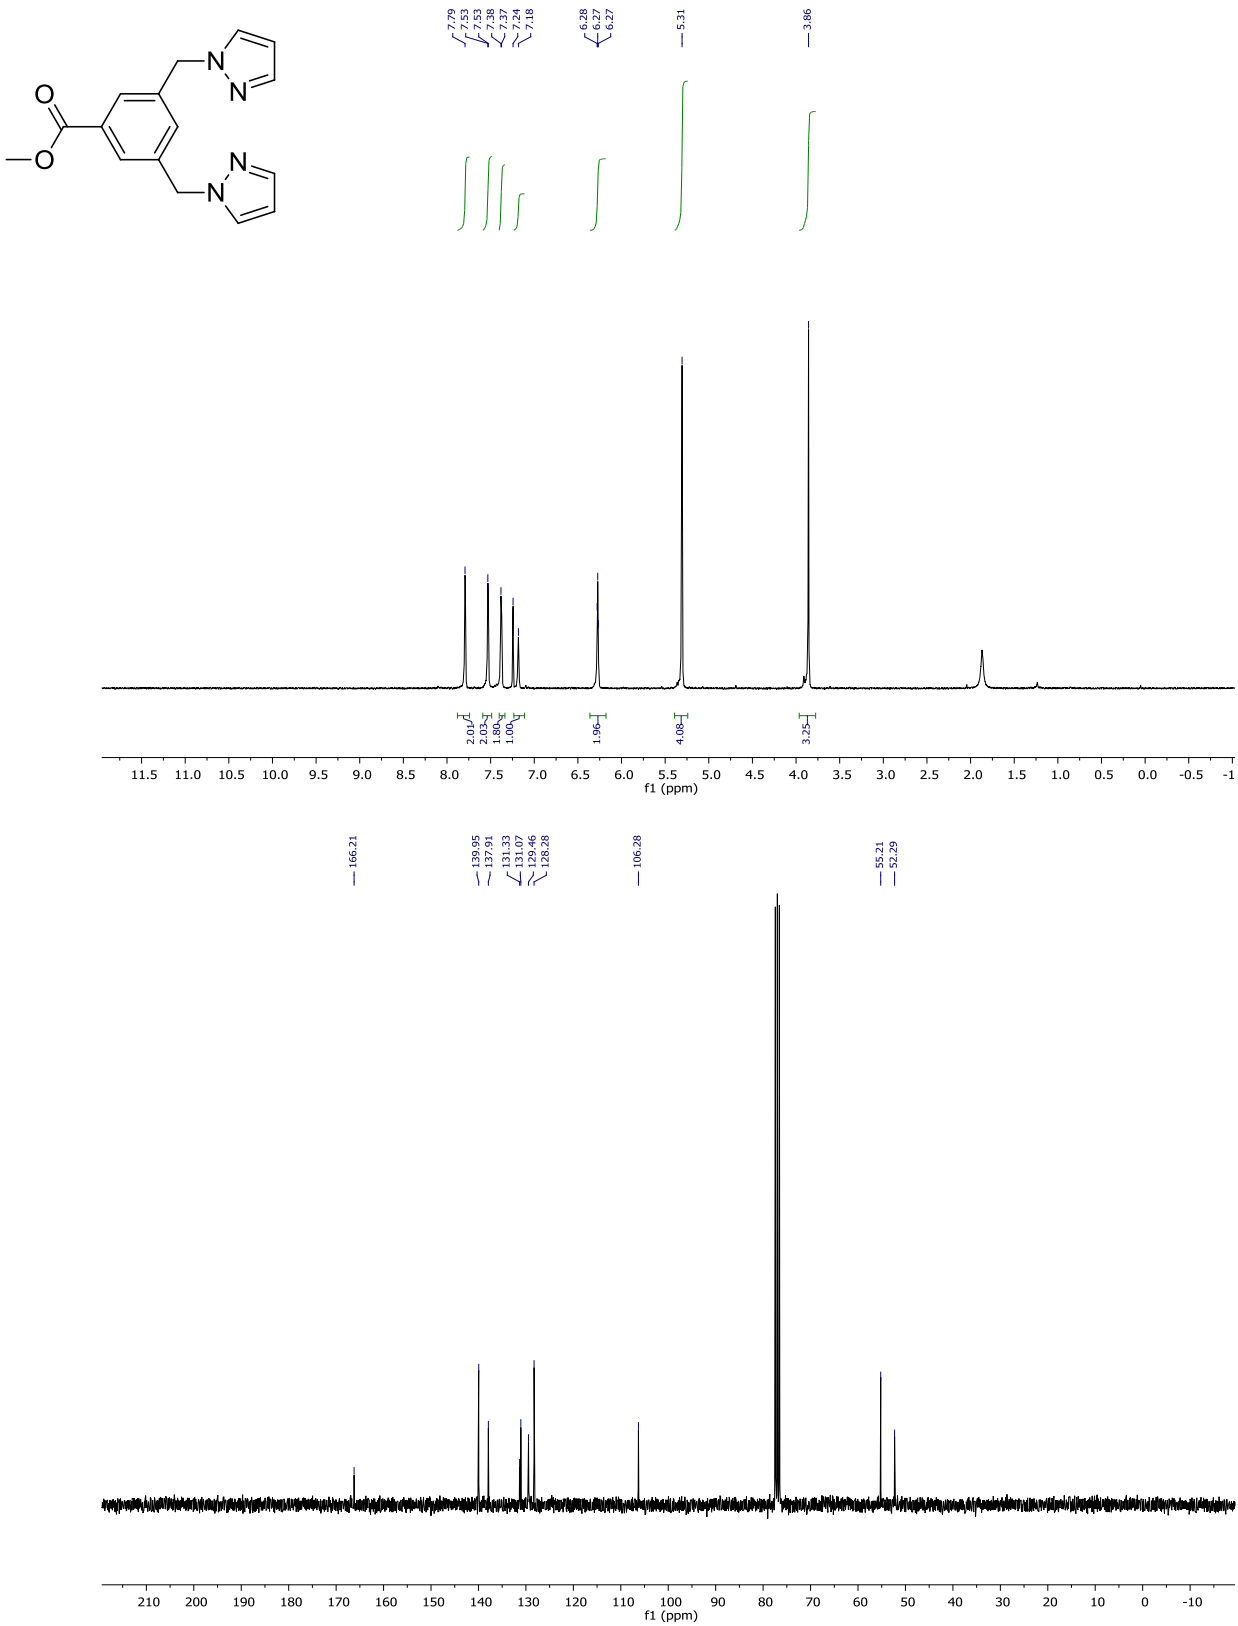

- Methyl 3,5-bis((1H-1,2,4-triazol-1-yl)methyl)benzoate (**L6**)

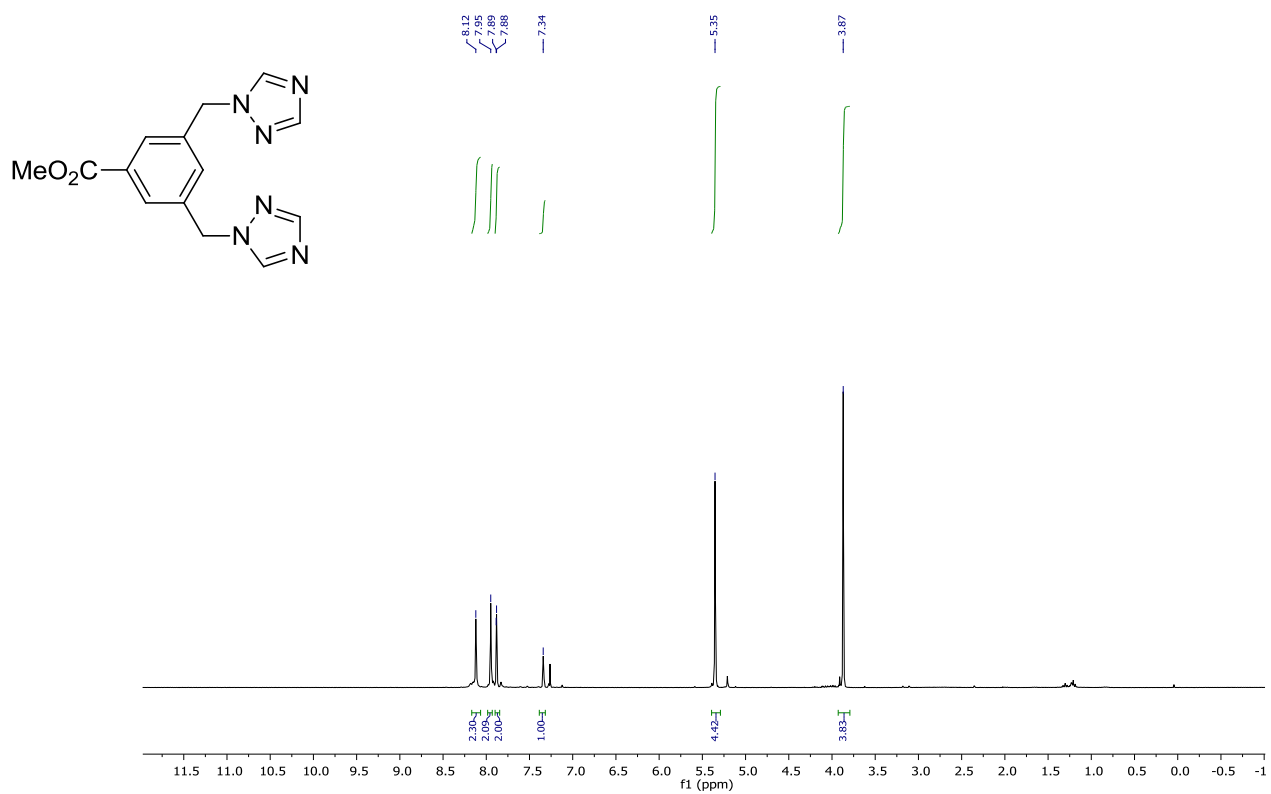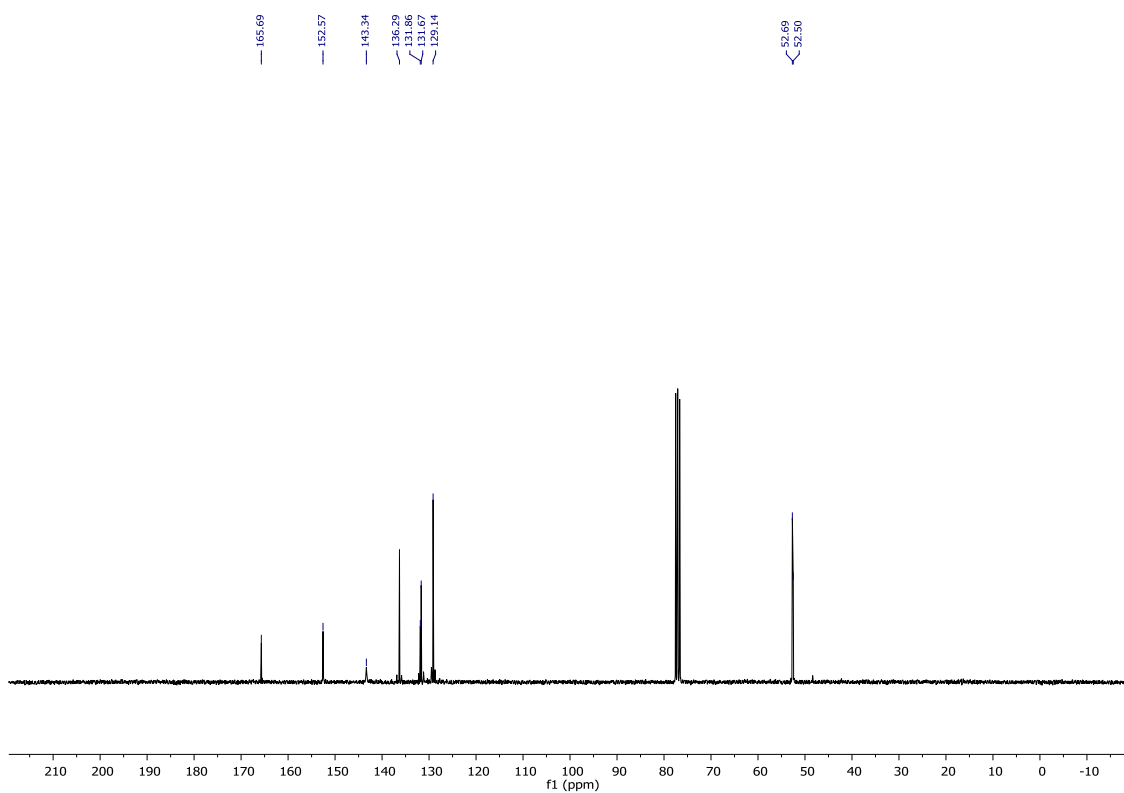

- Acetophenone

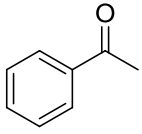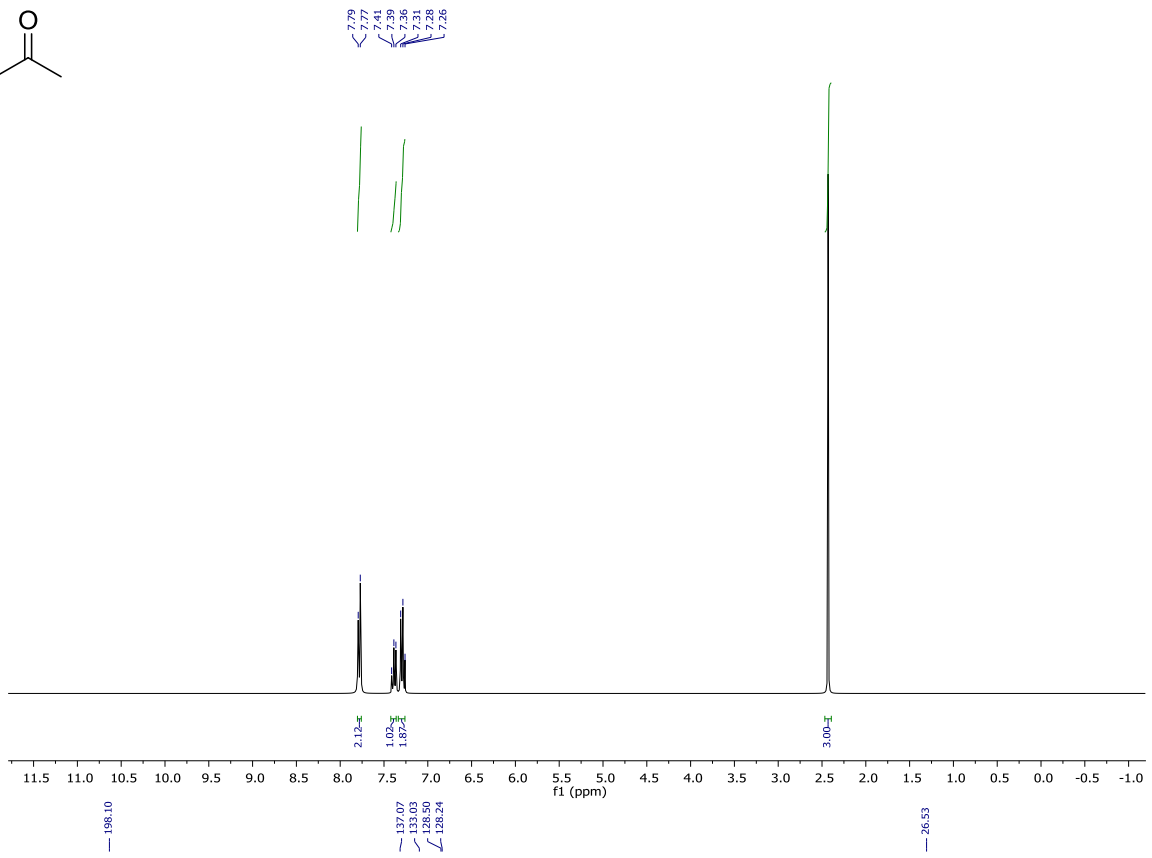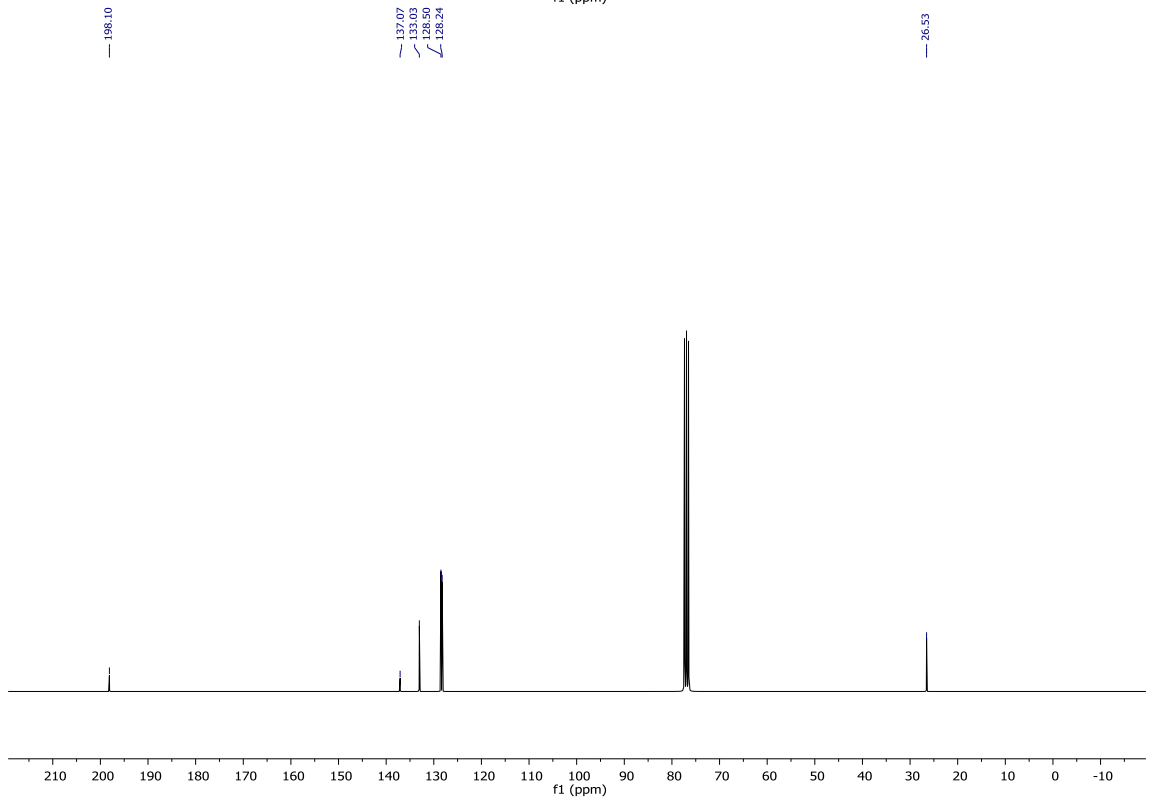

- 1-Phenyl-1-propanone

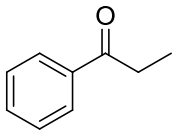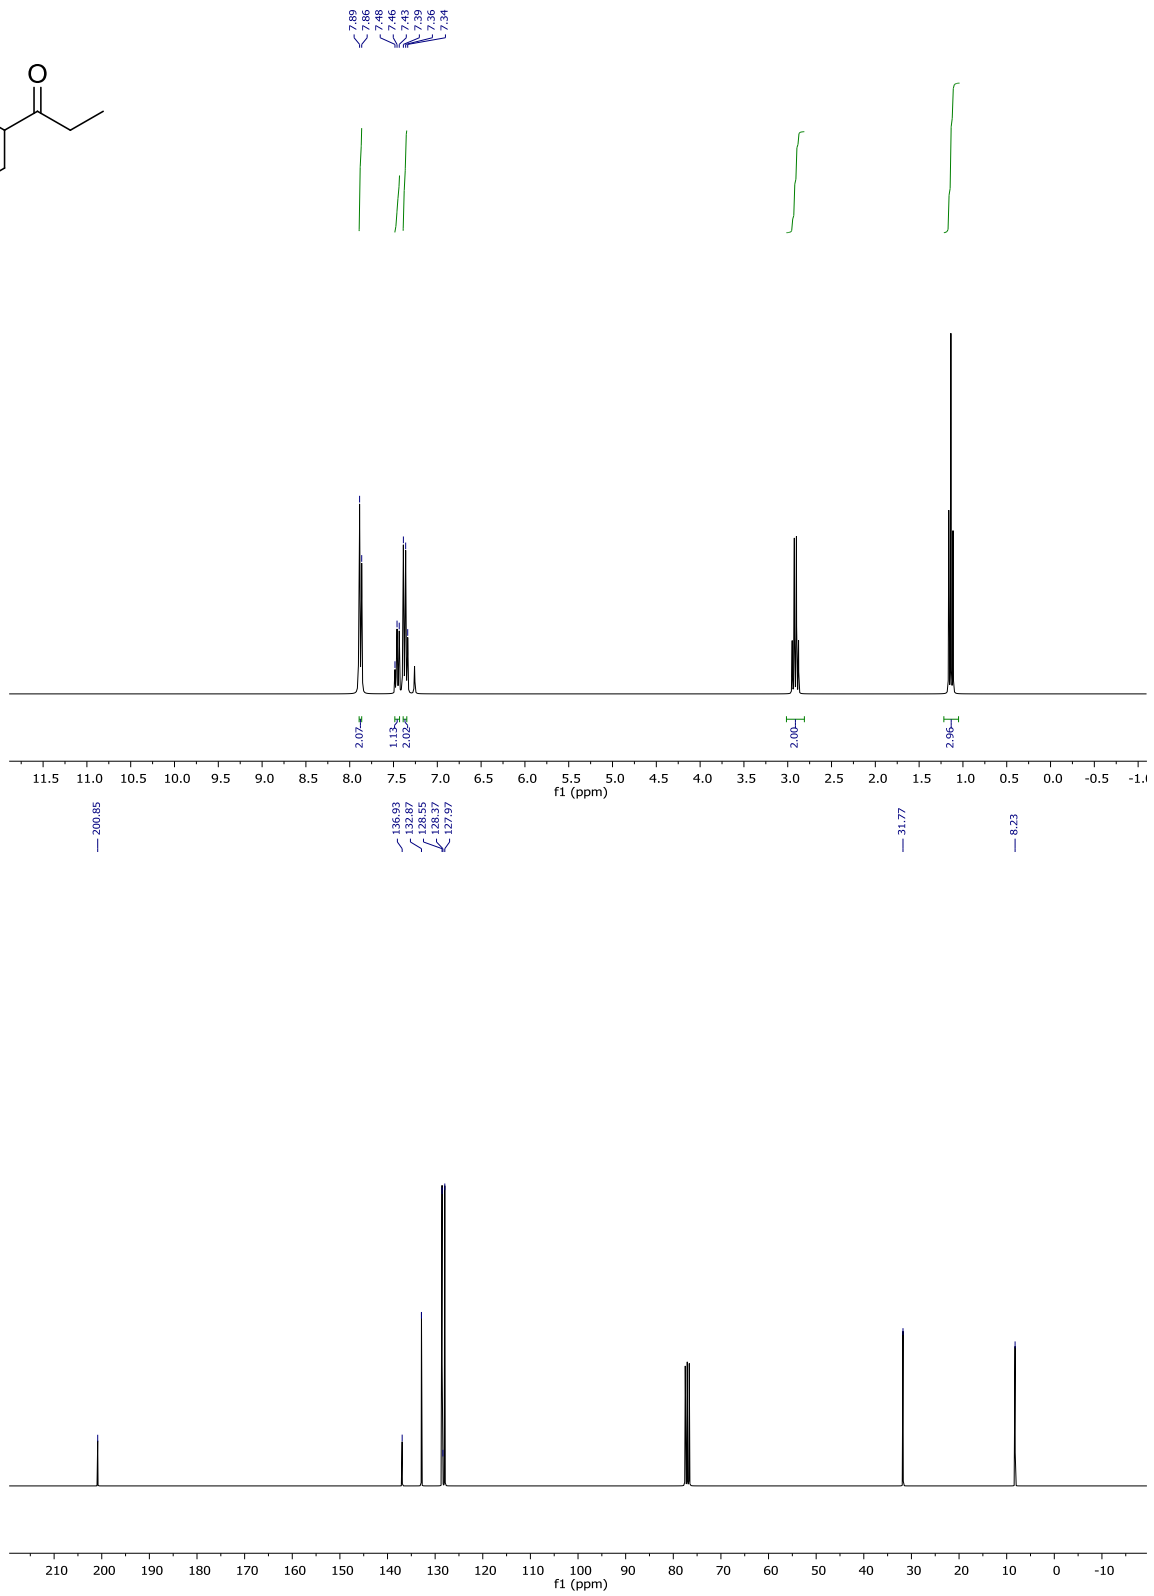

- 2,2-Dimethyl-1-phenylpropanone

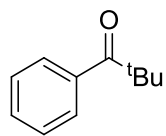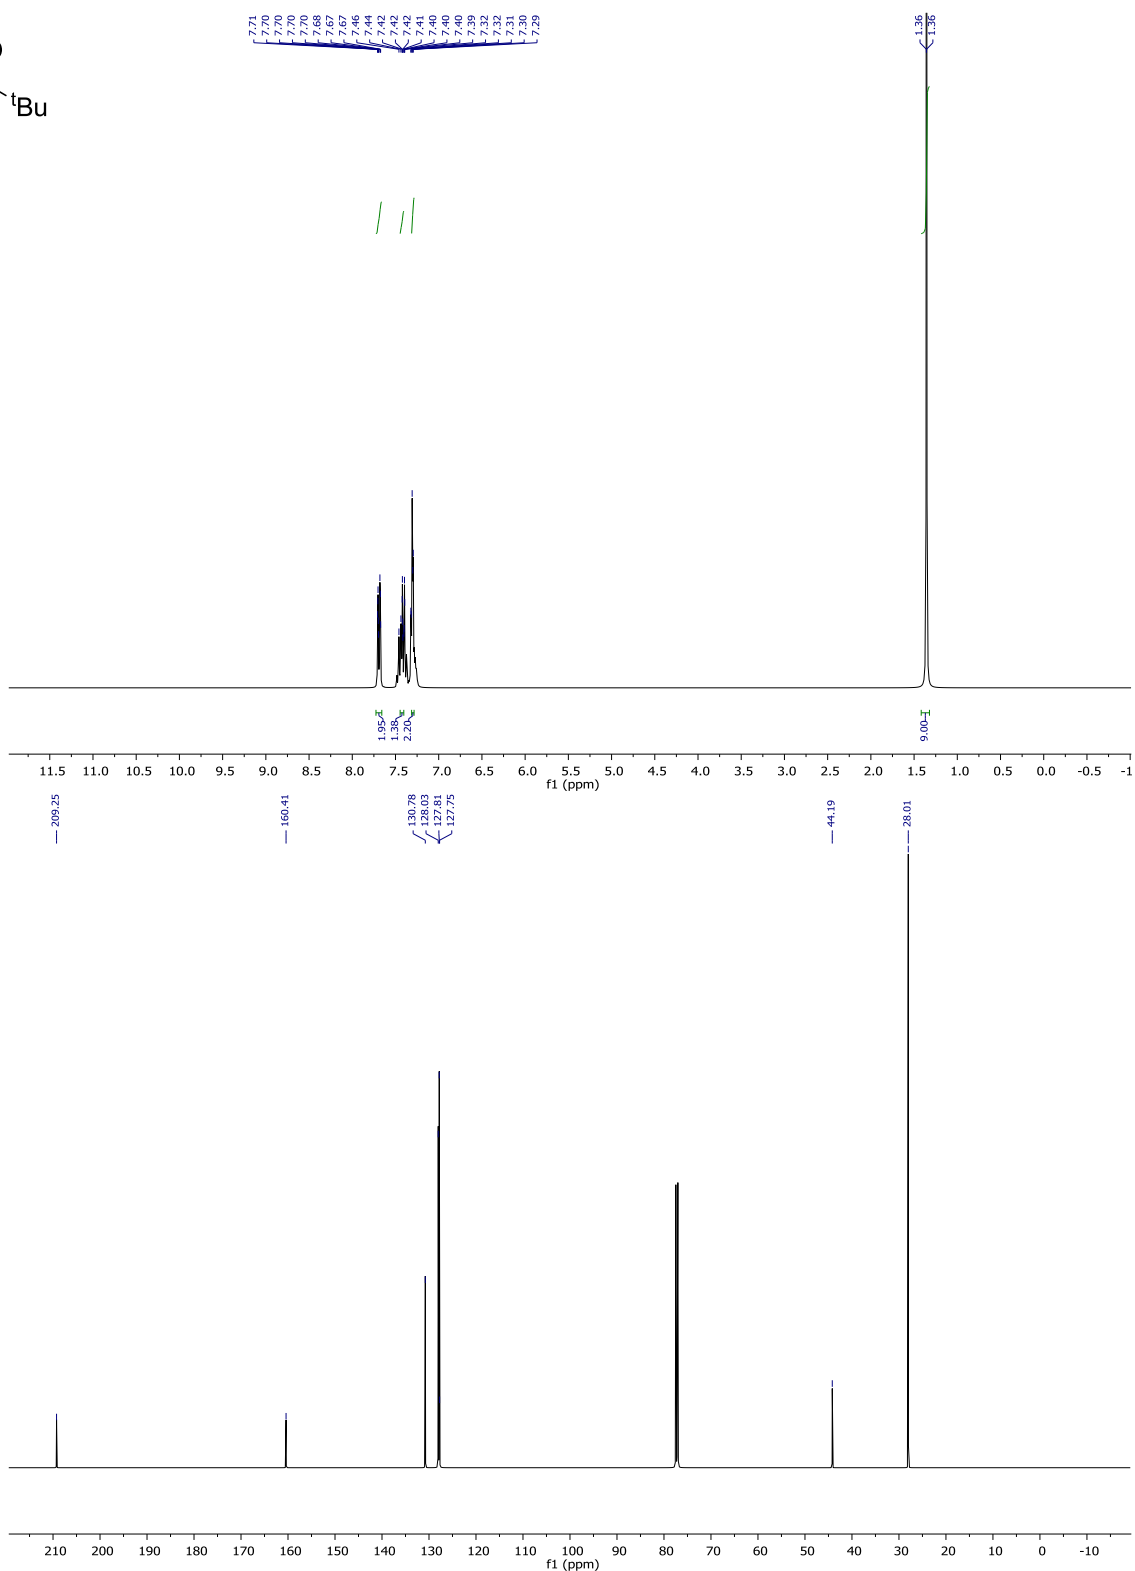

- Benzoyl cyanide

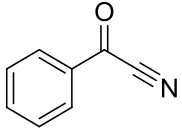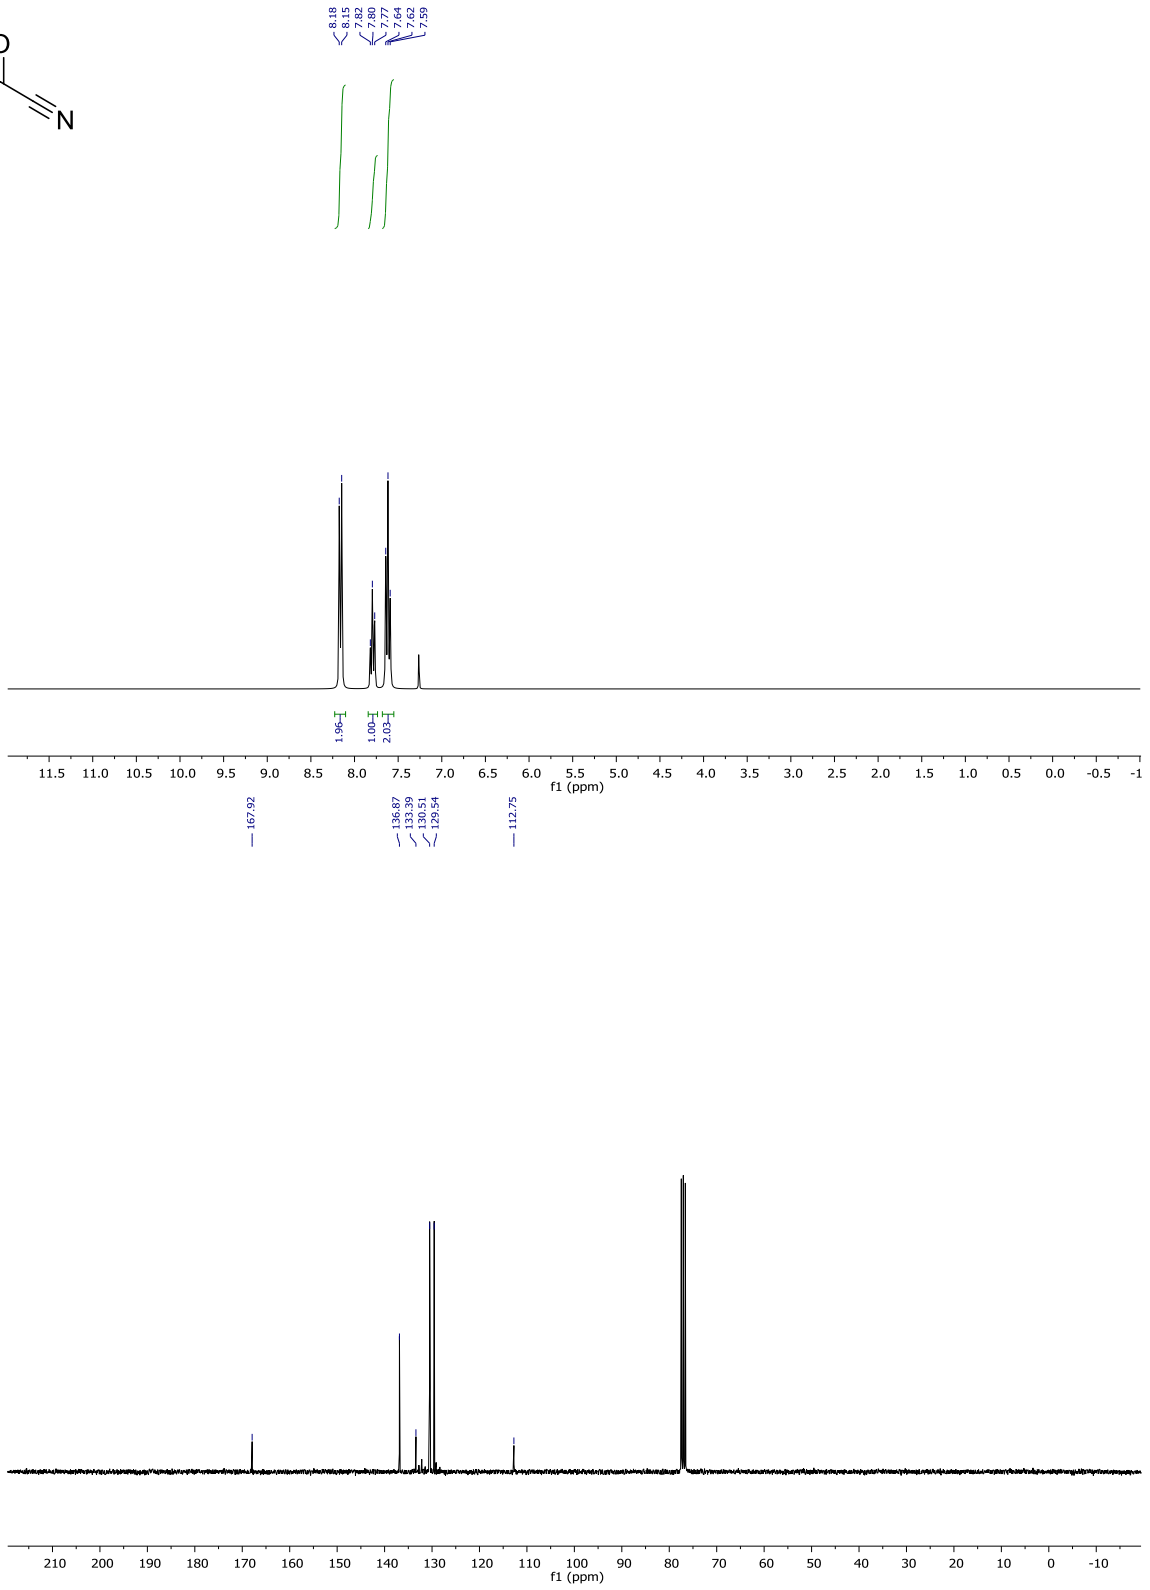

-2-Oxo-phenylacetic acid

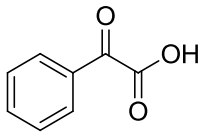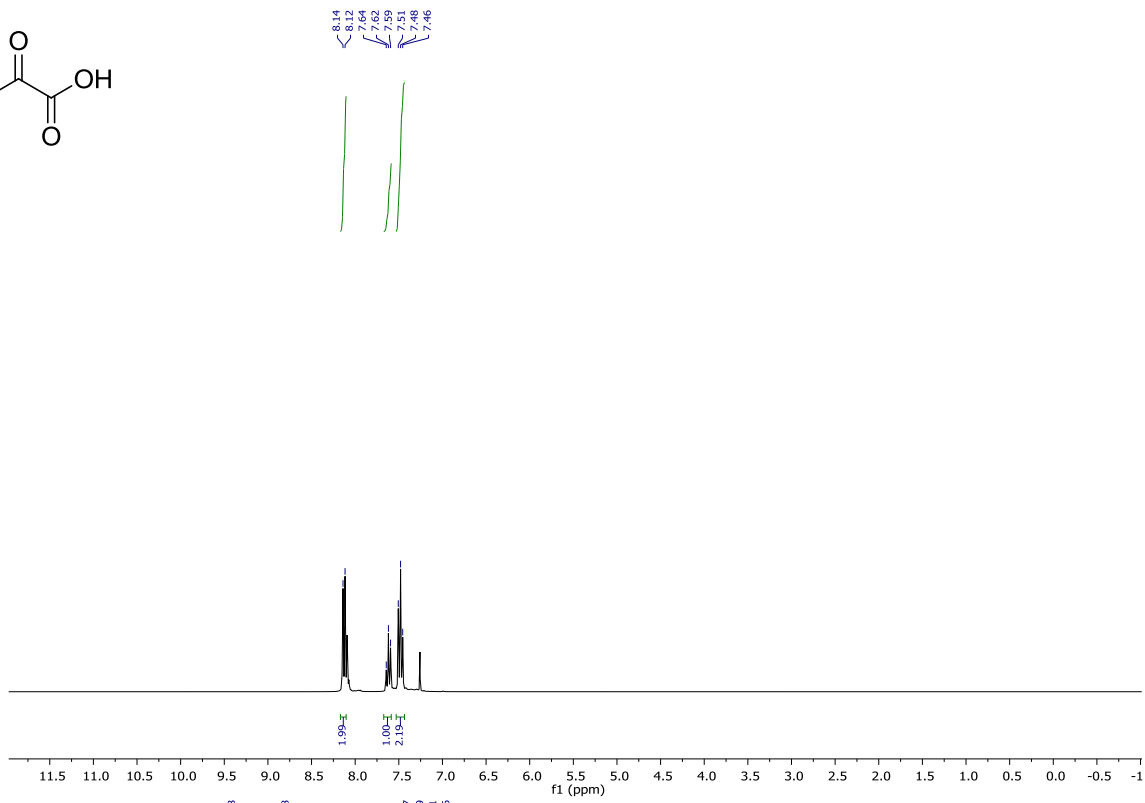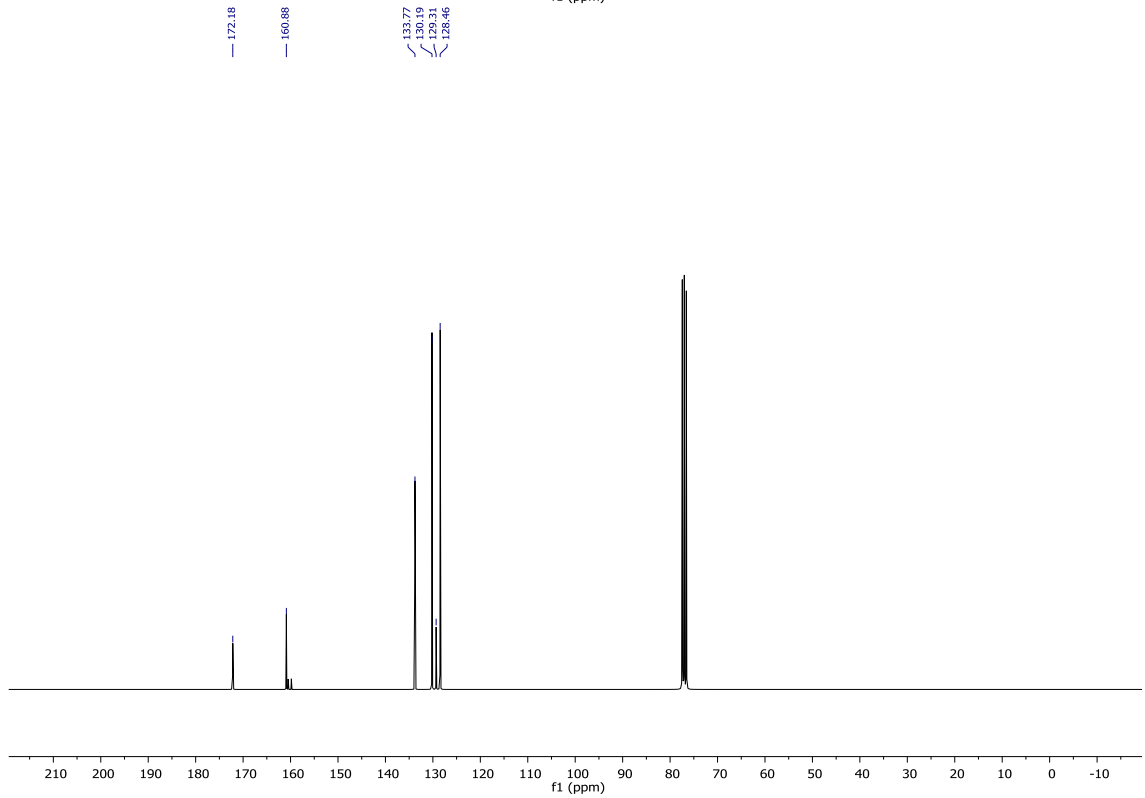



- 1-(2-Methoxyphenyl)ethanone

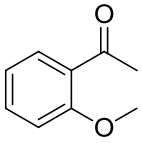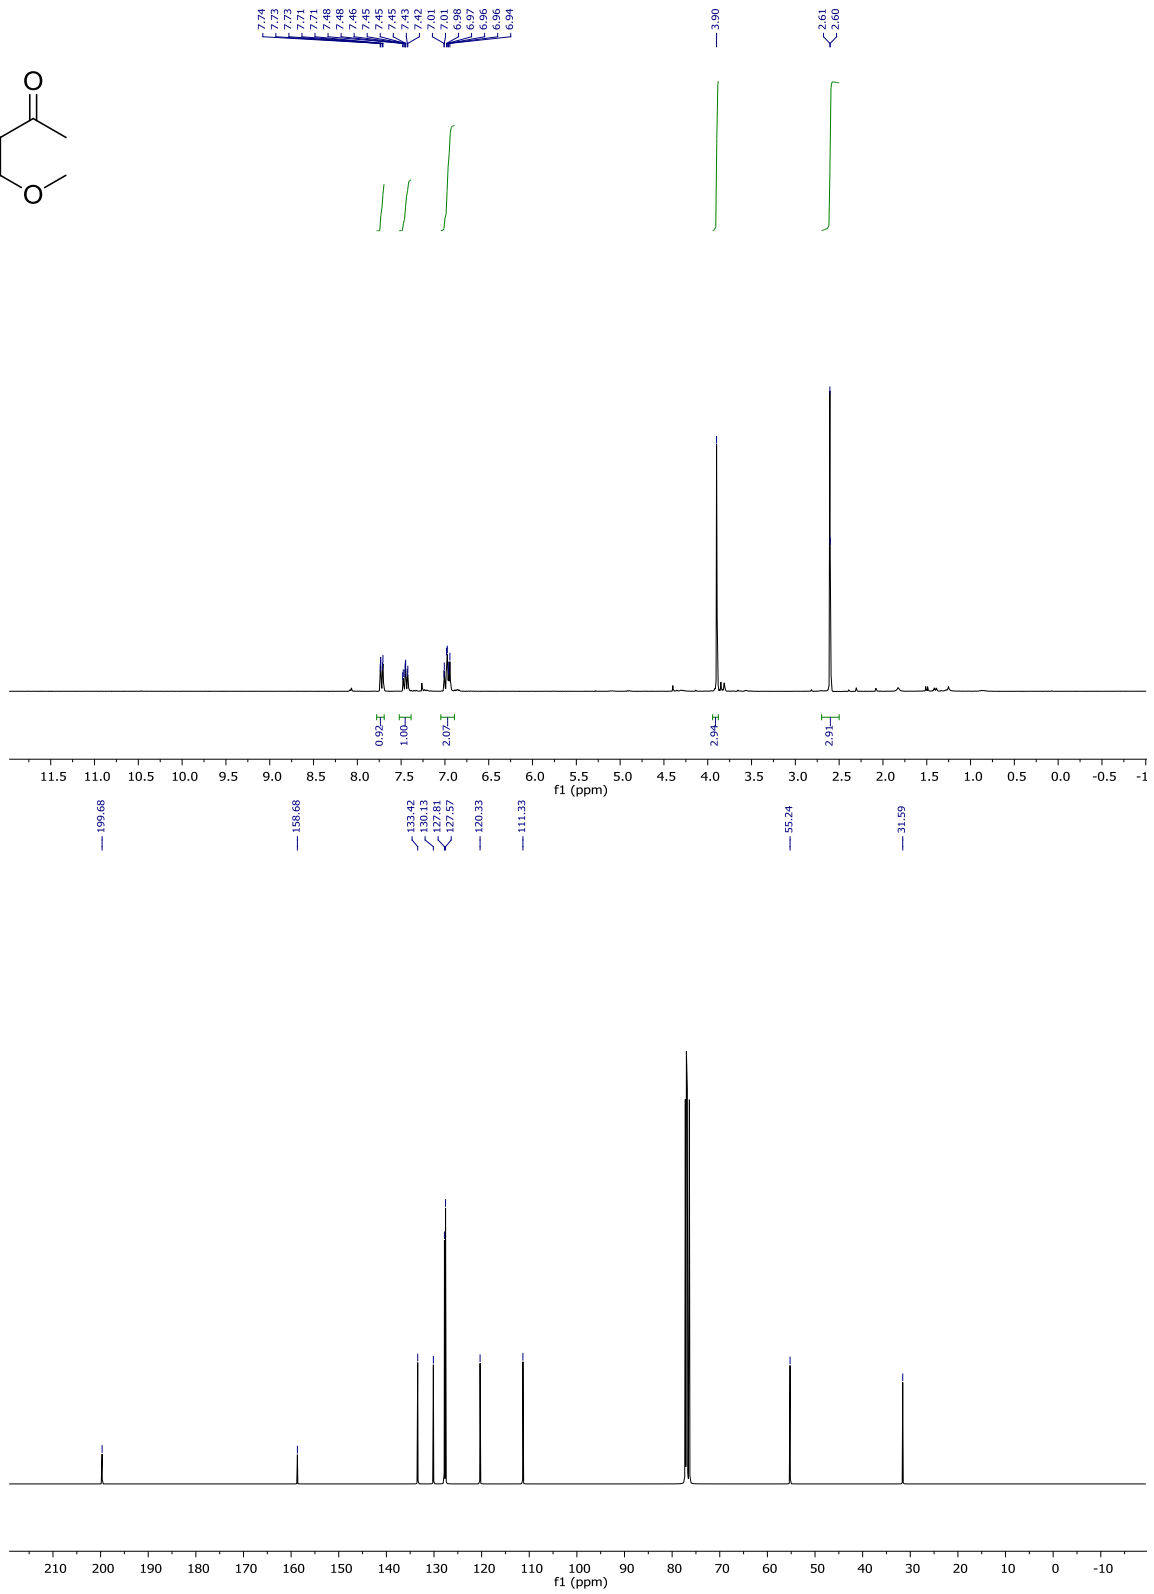

- 1-(*p*-Tolyl)ethanone

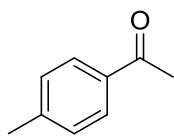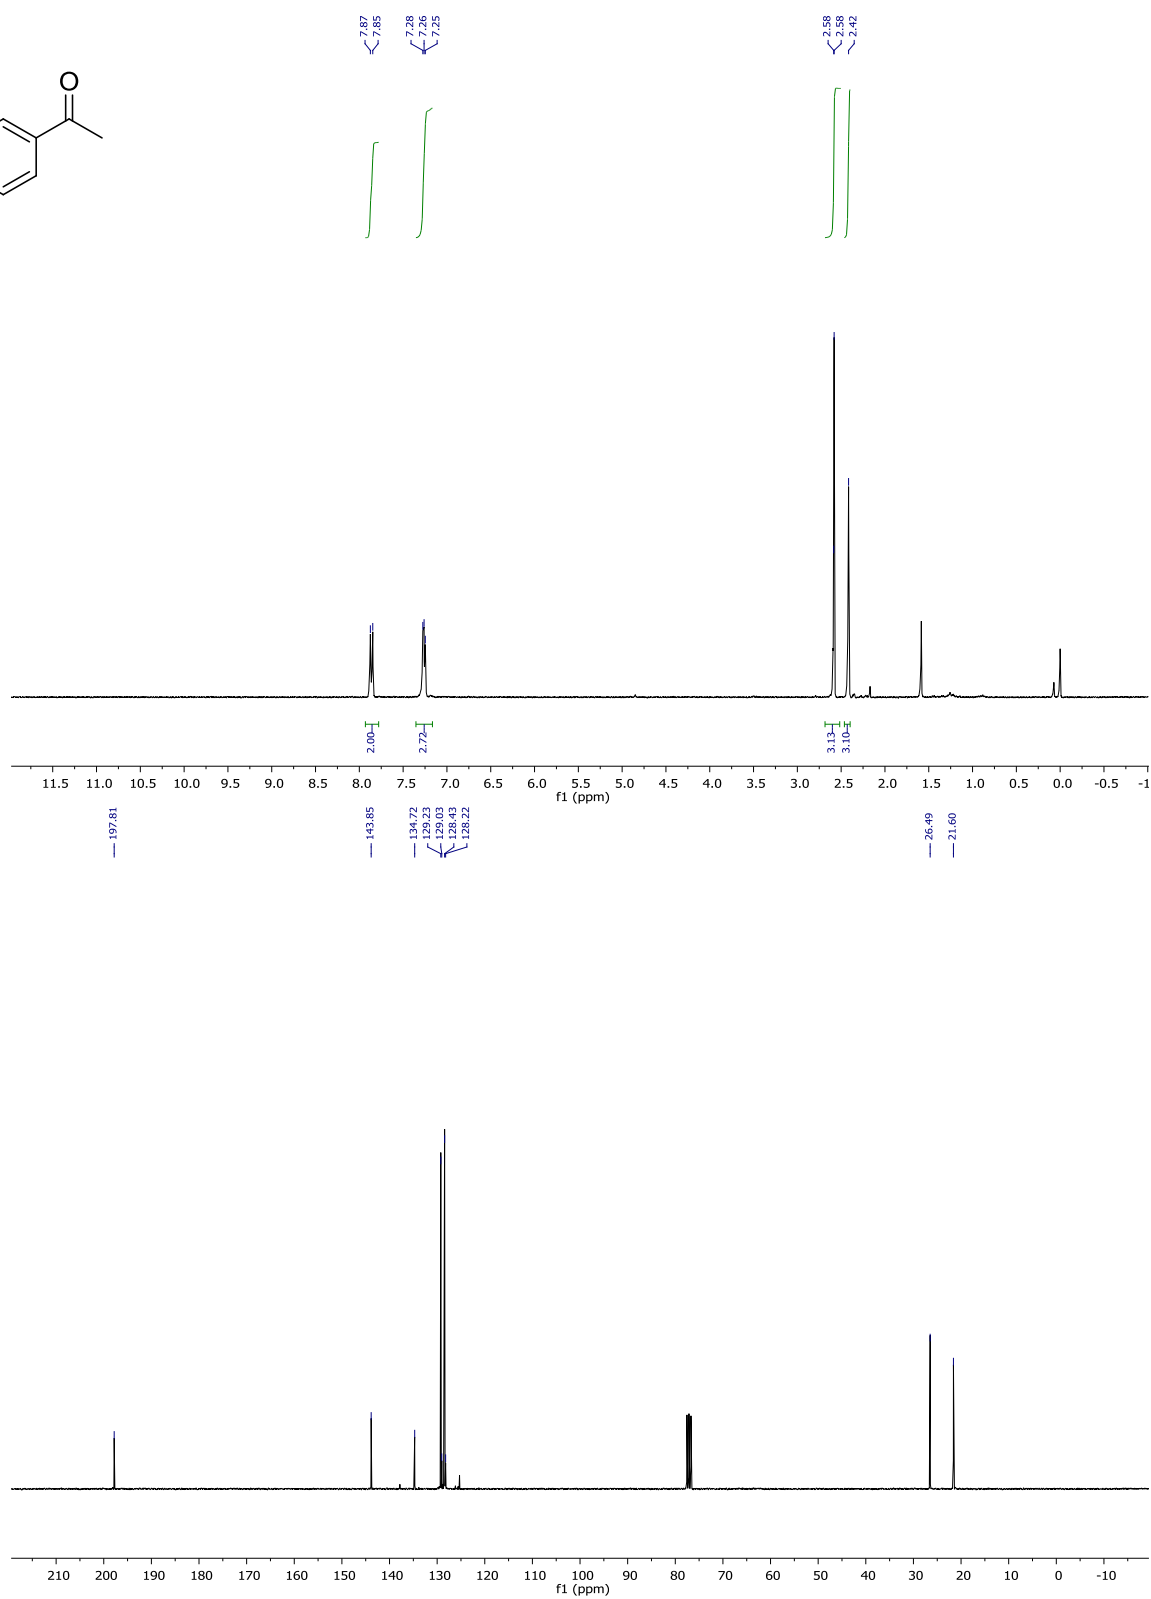

- 4-Chloroacetophenone

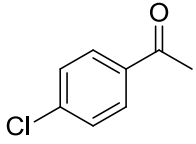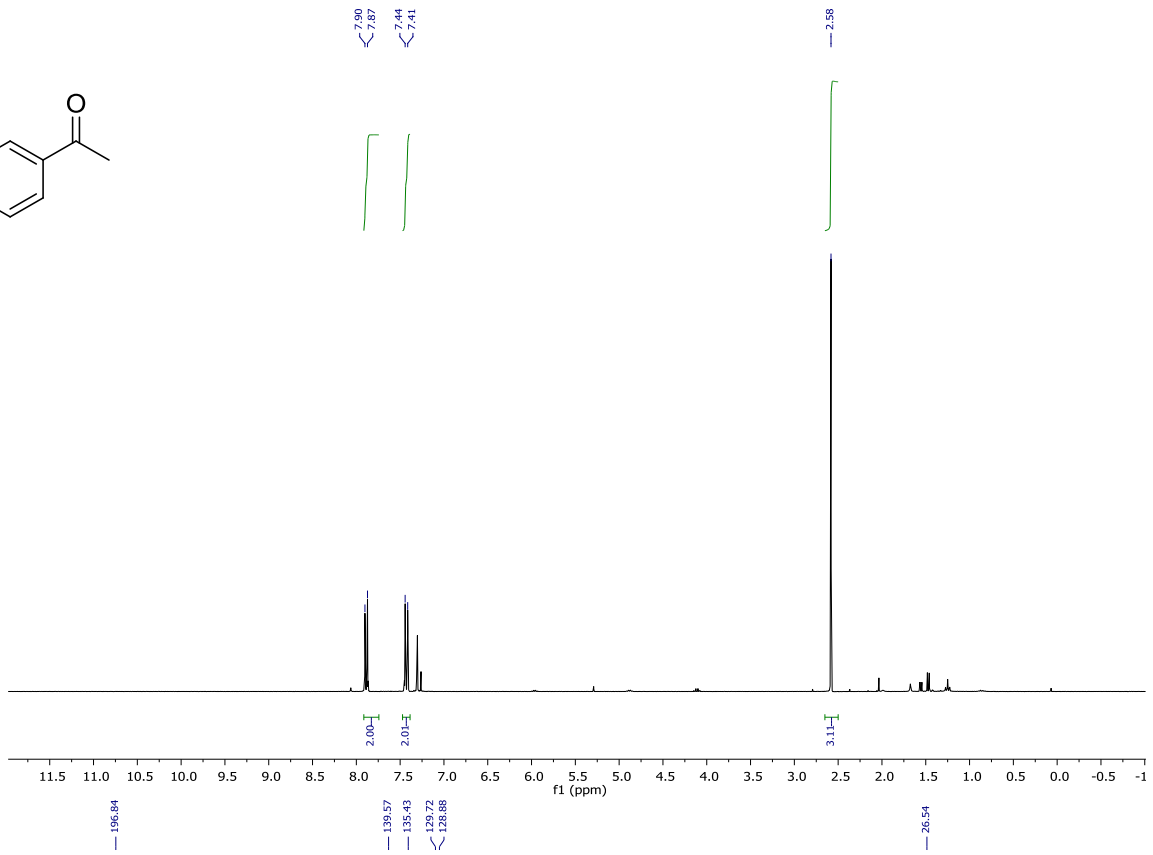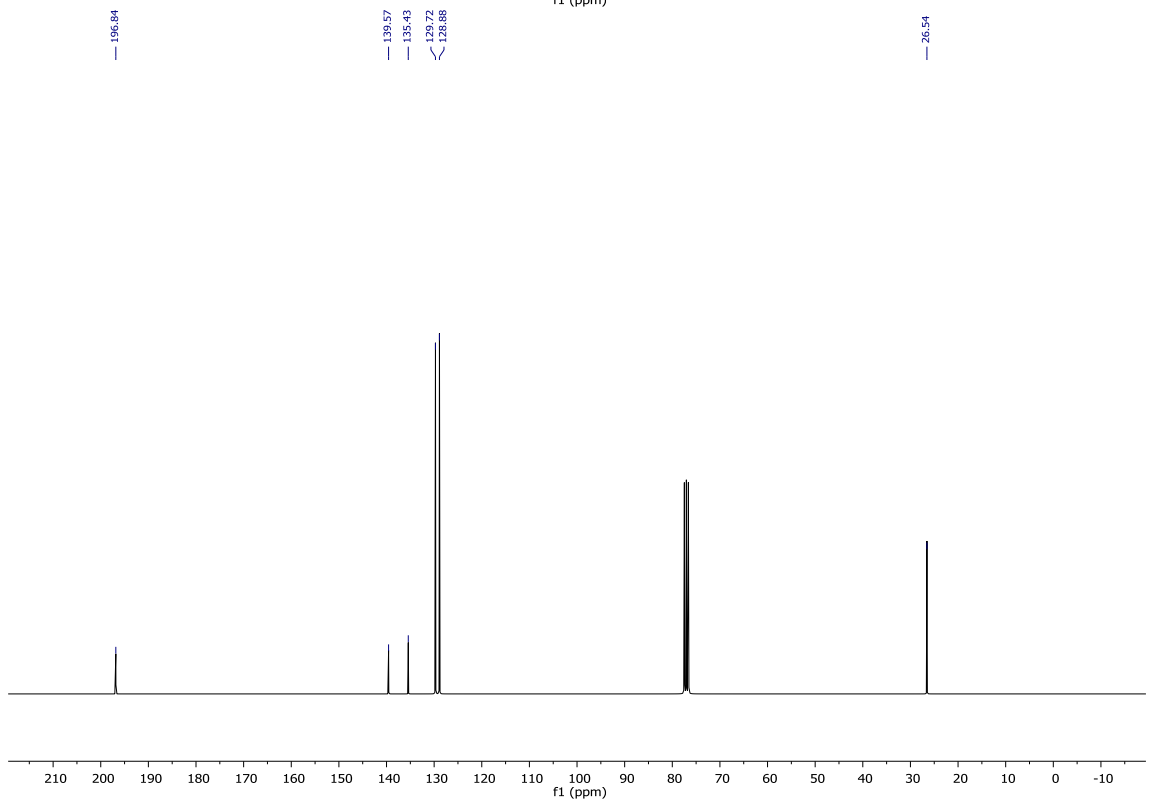

- Indanone

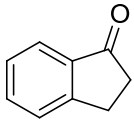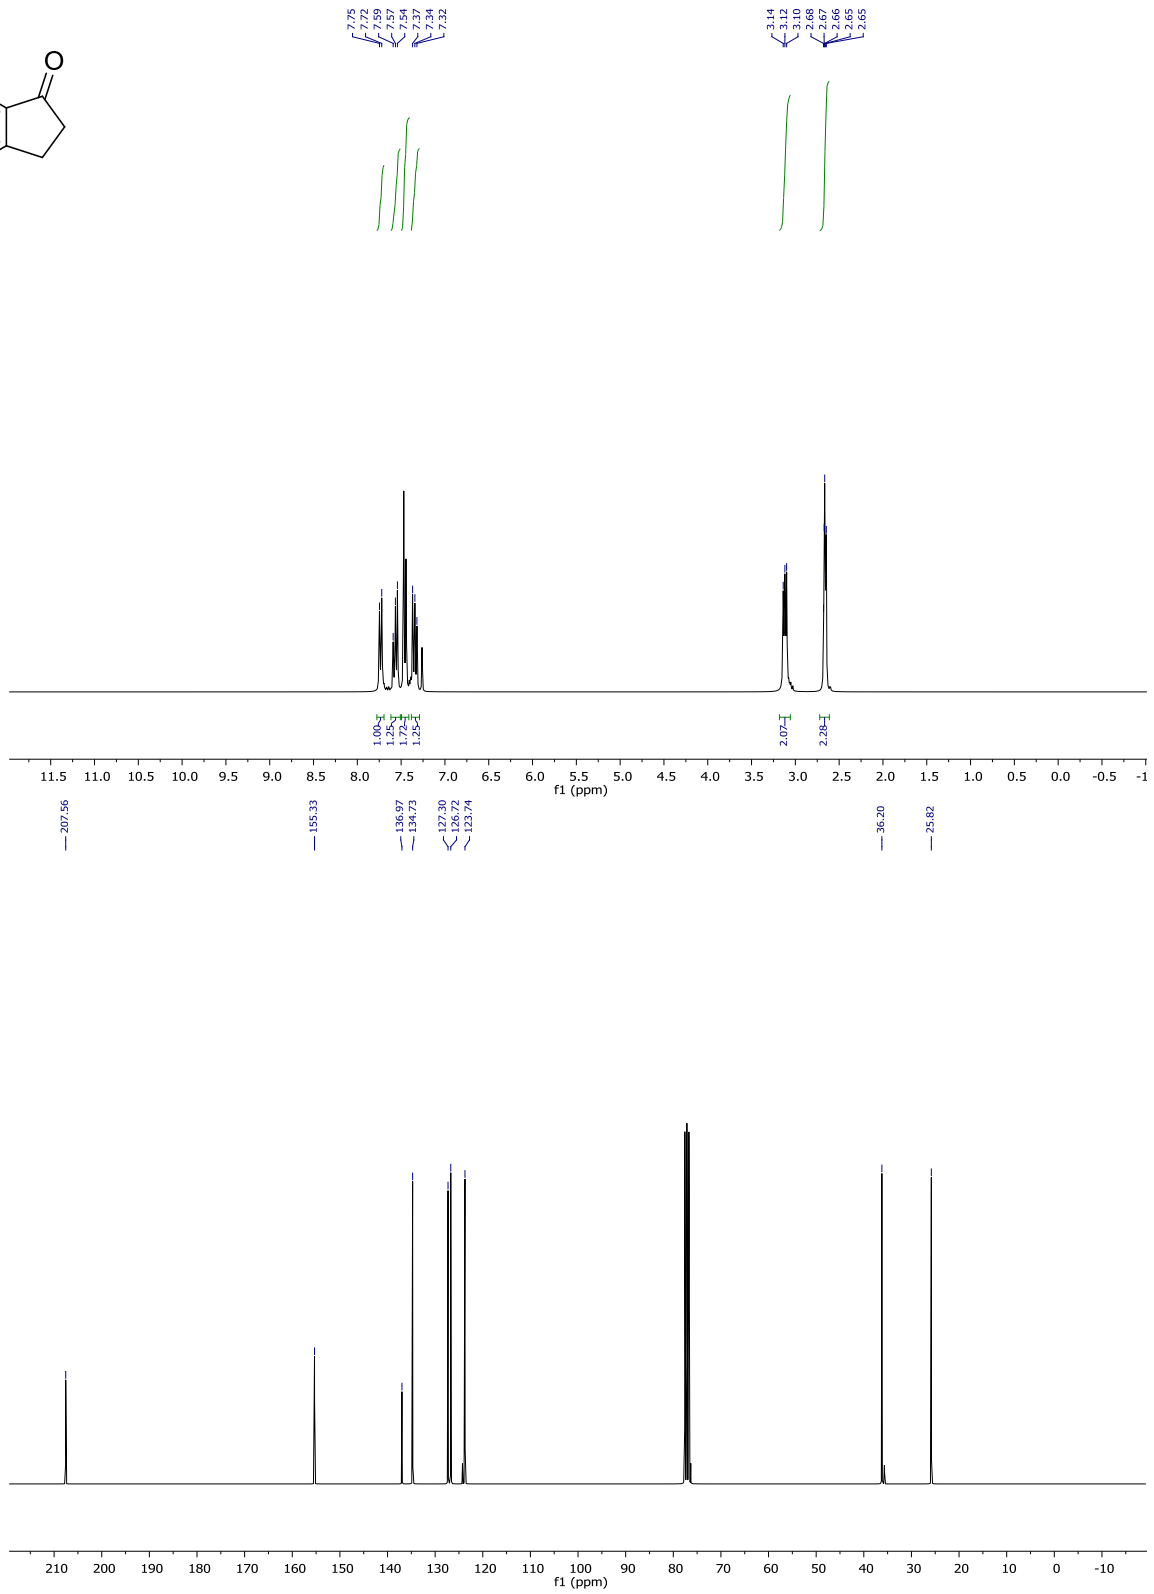

- Fluorenone

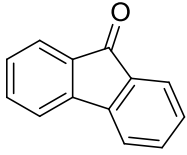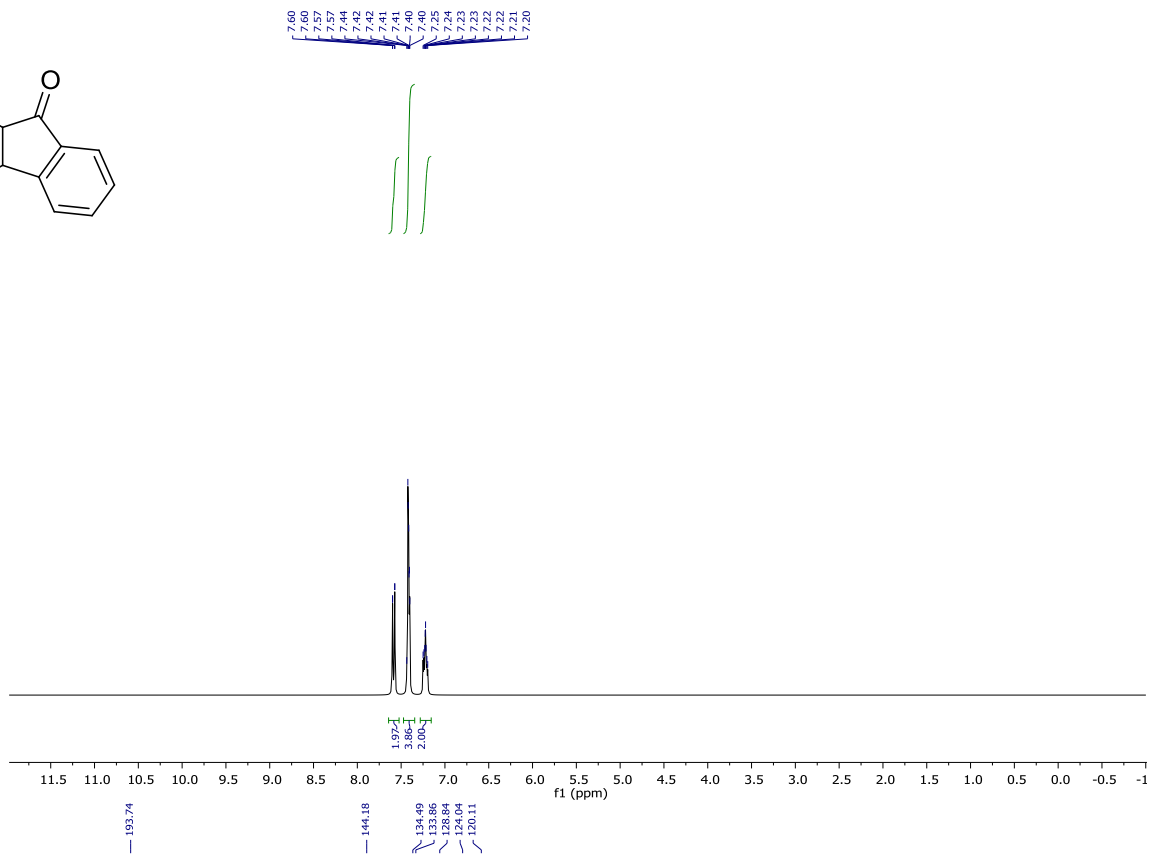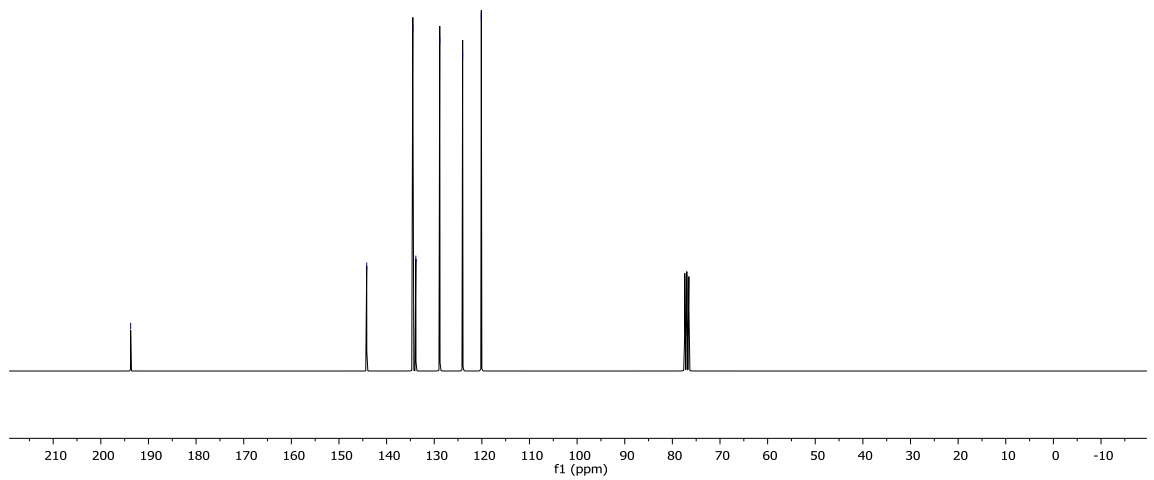

- Xanthenone

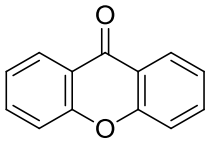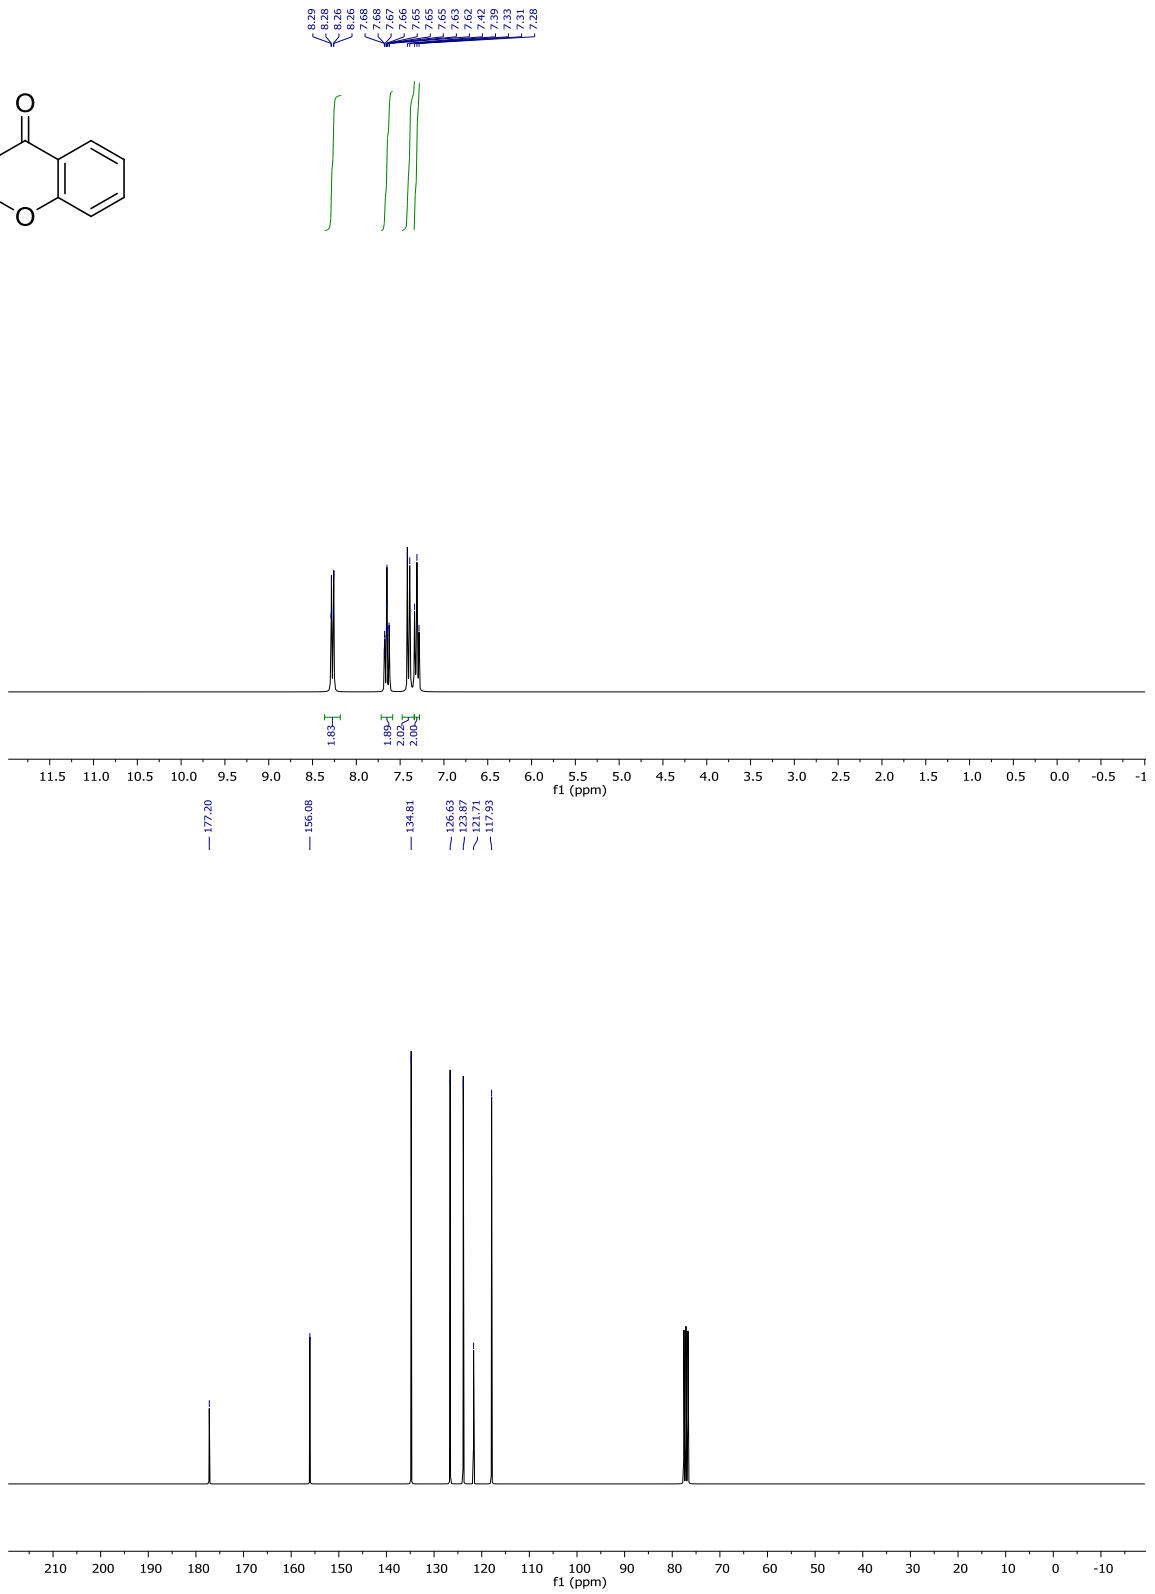

- Benzophenone

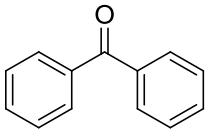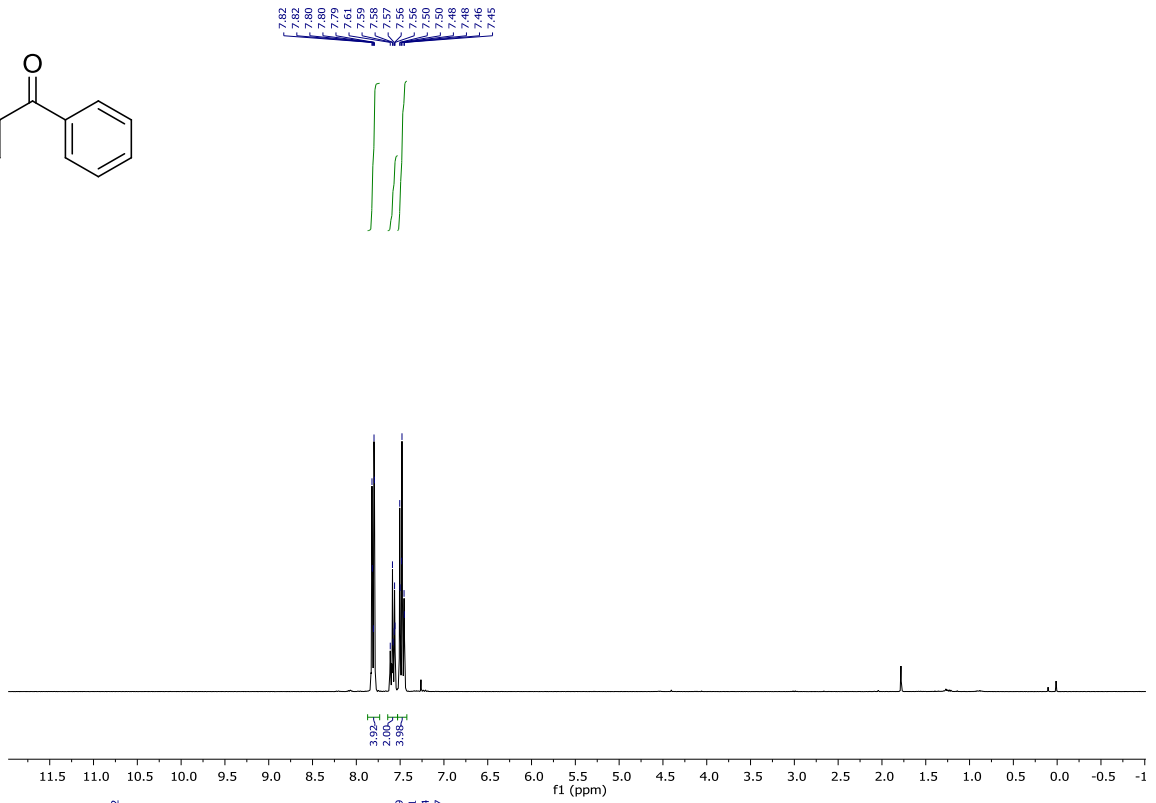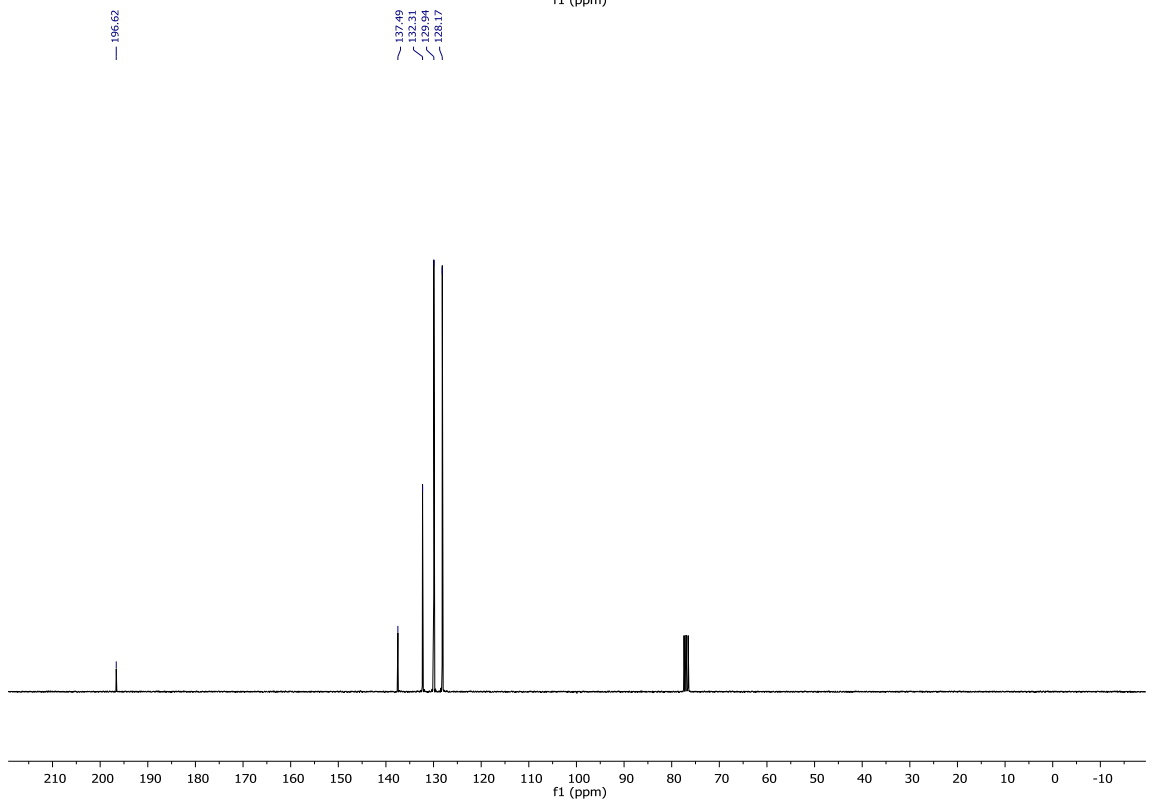

- 2-Methylbenzophenone

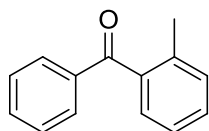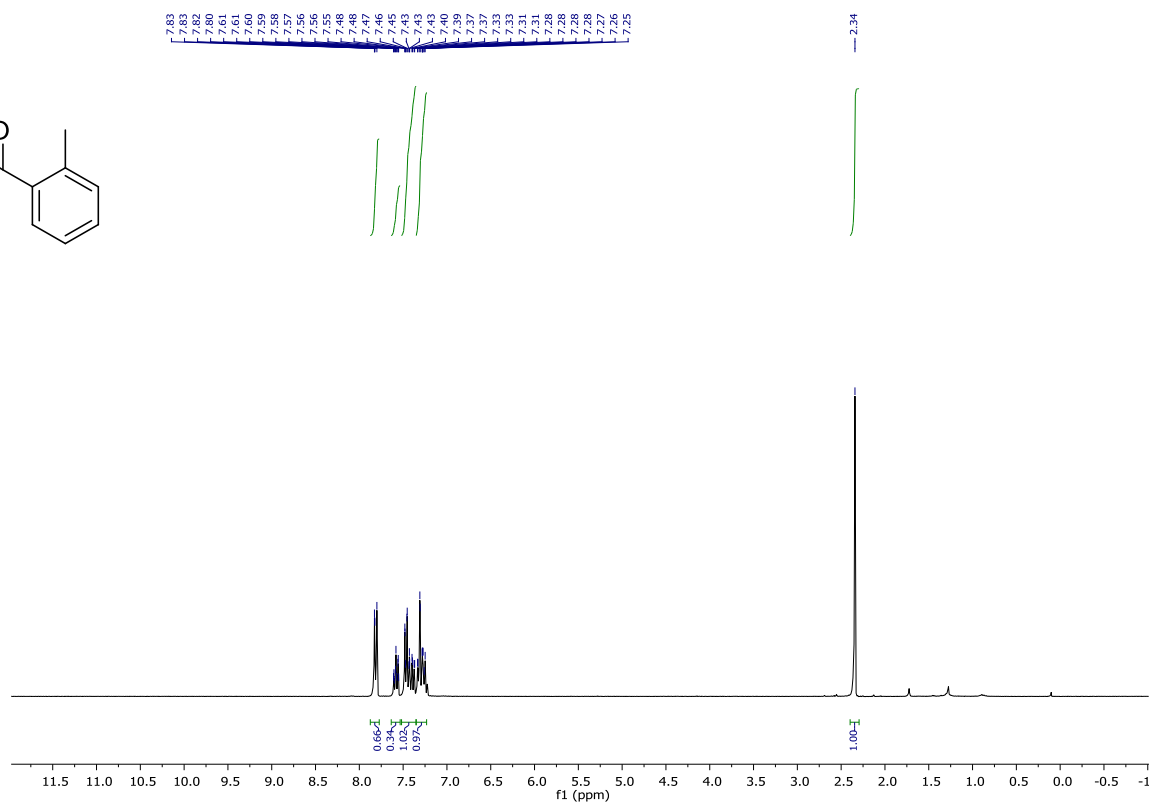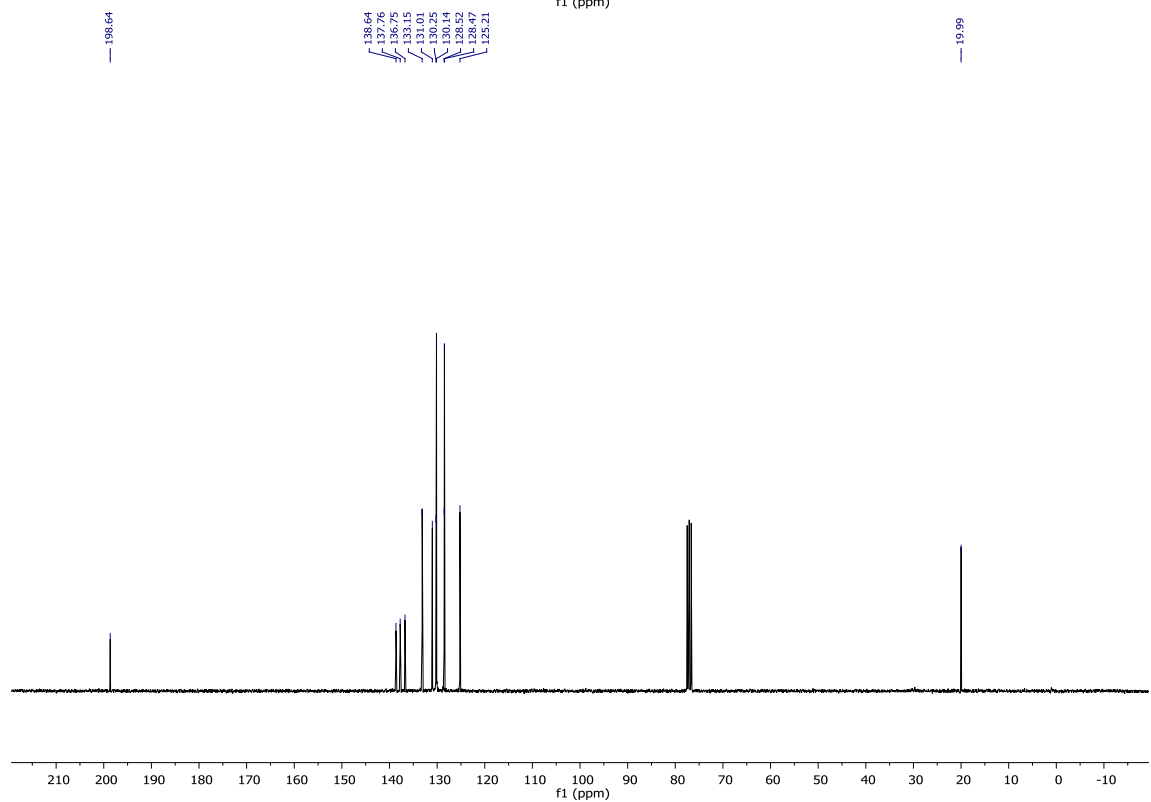



-Benzil

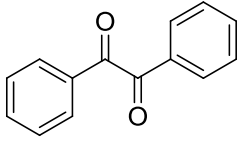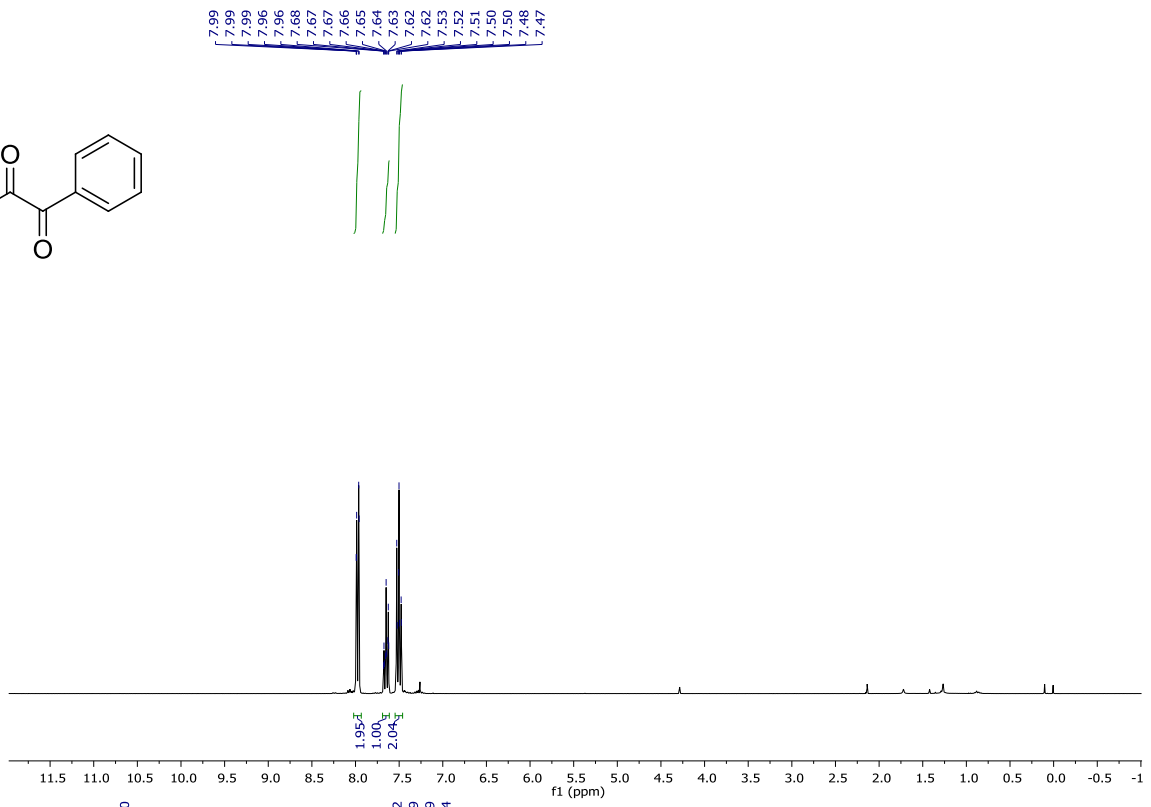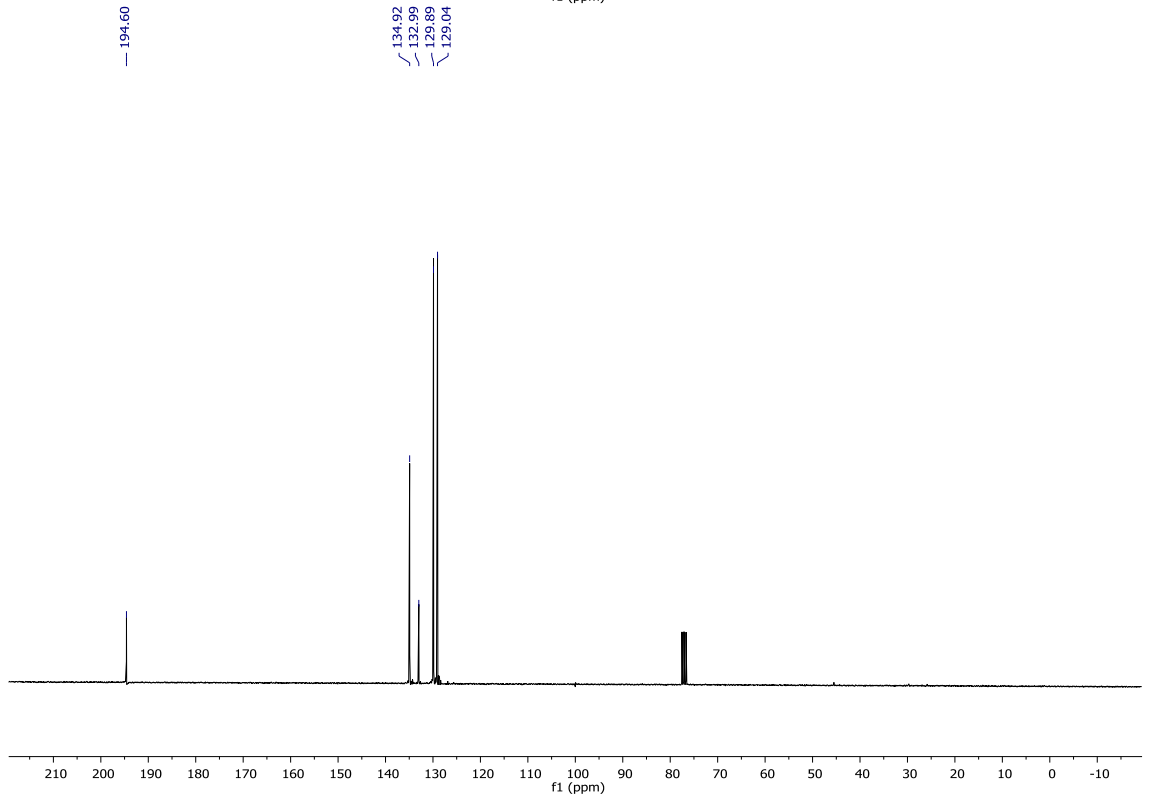

# -Deoxybenzoin

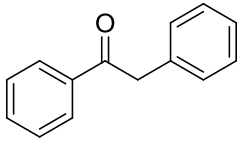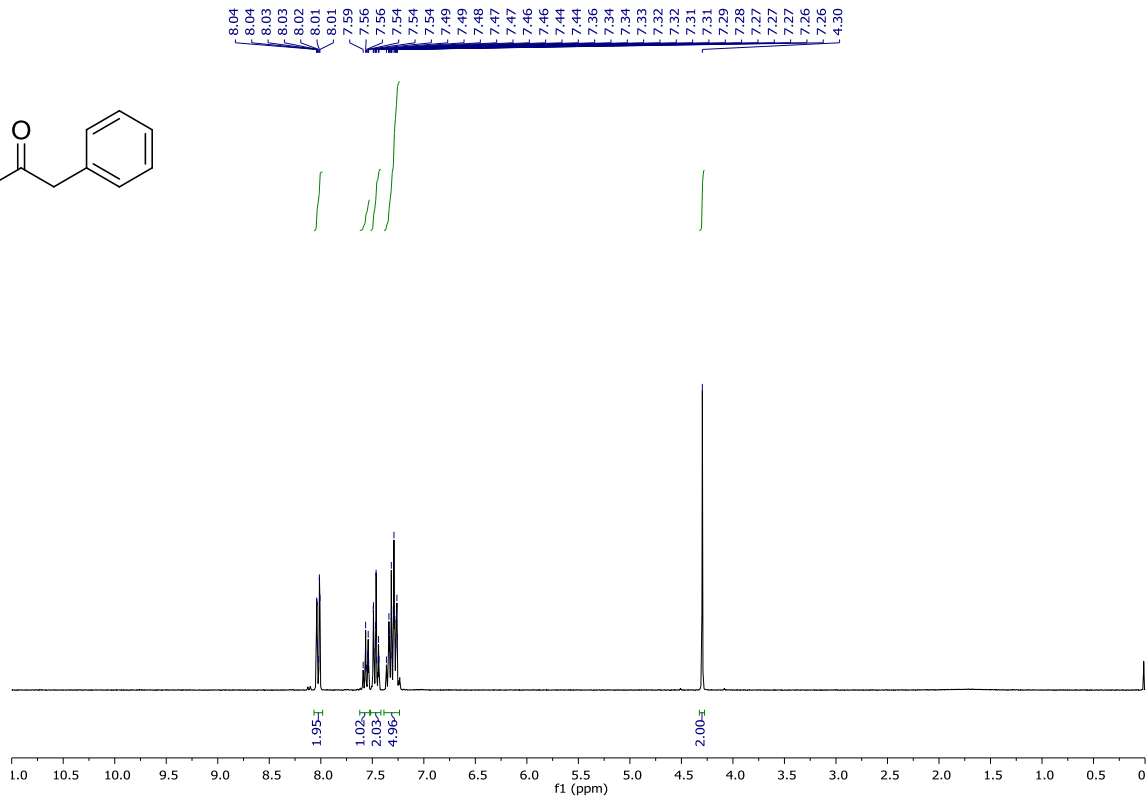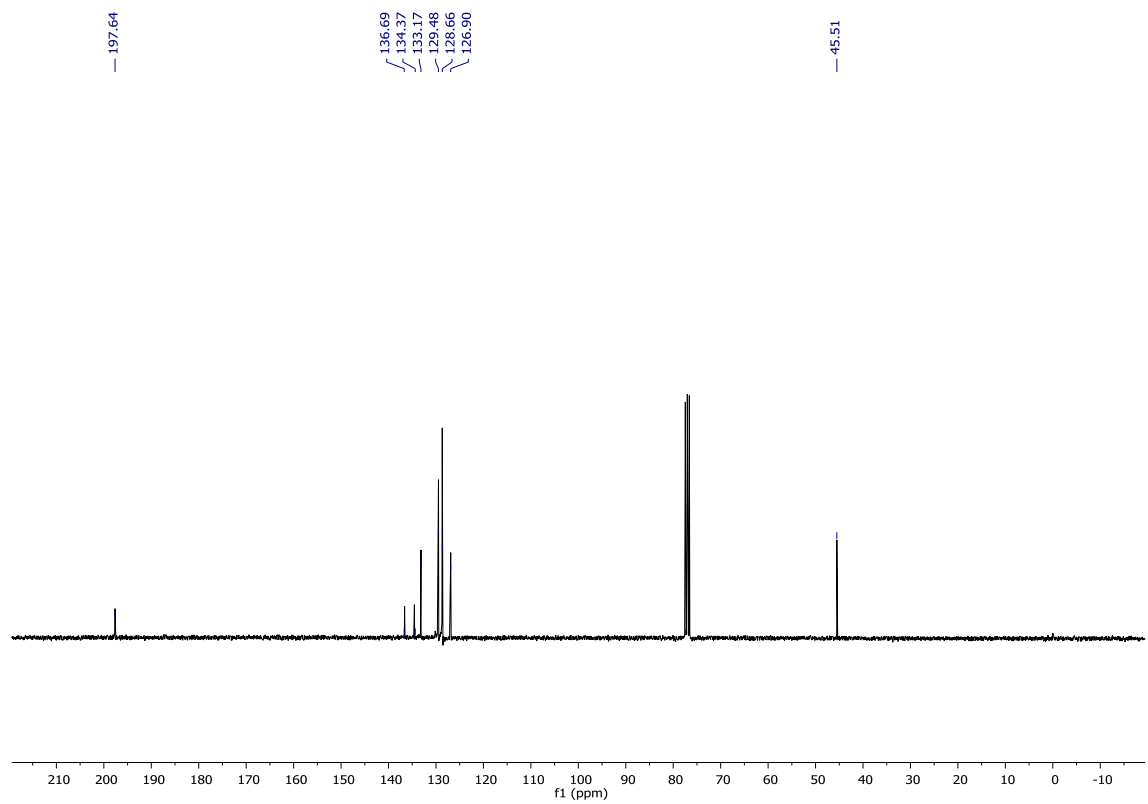

- Anthraquinone

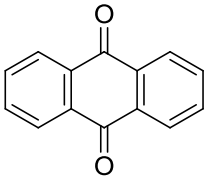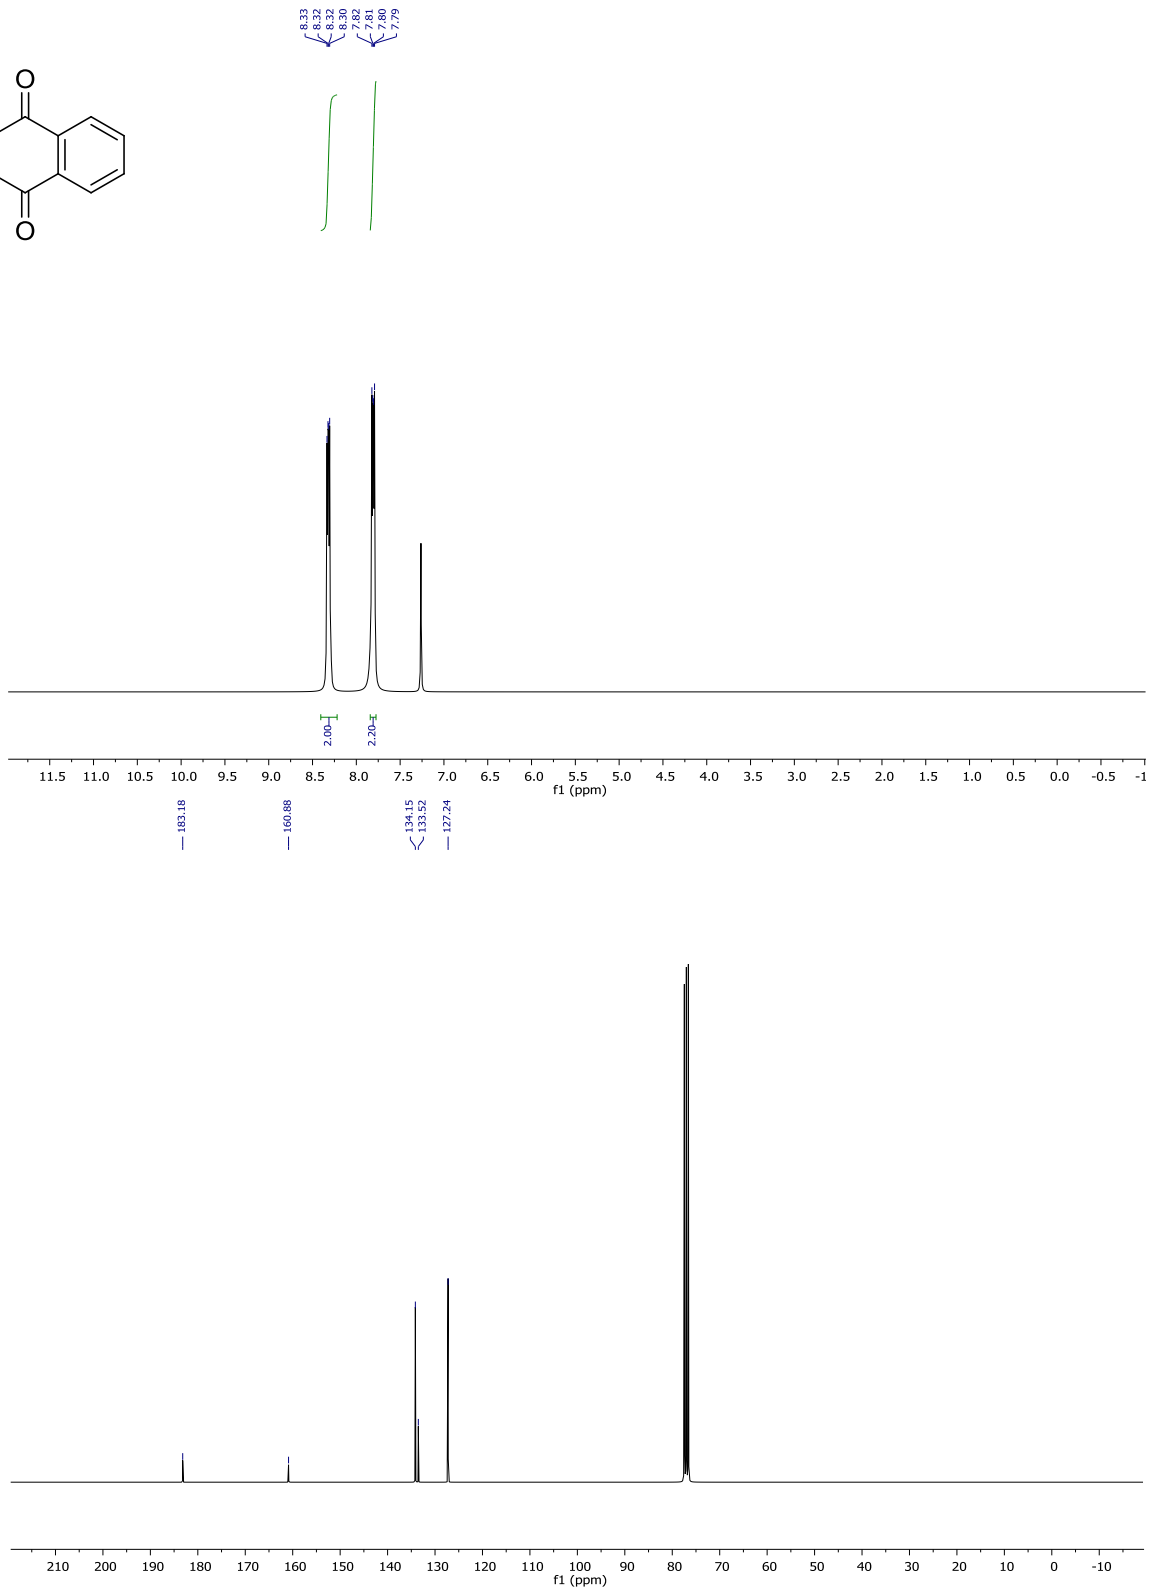

- Benzoic acid

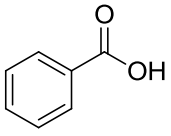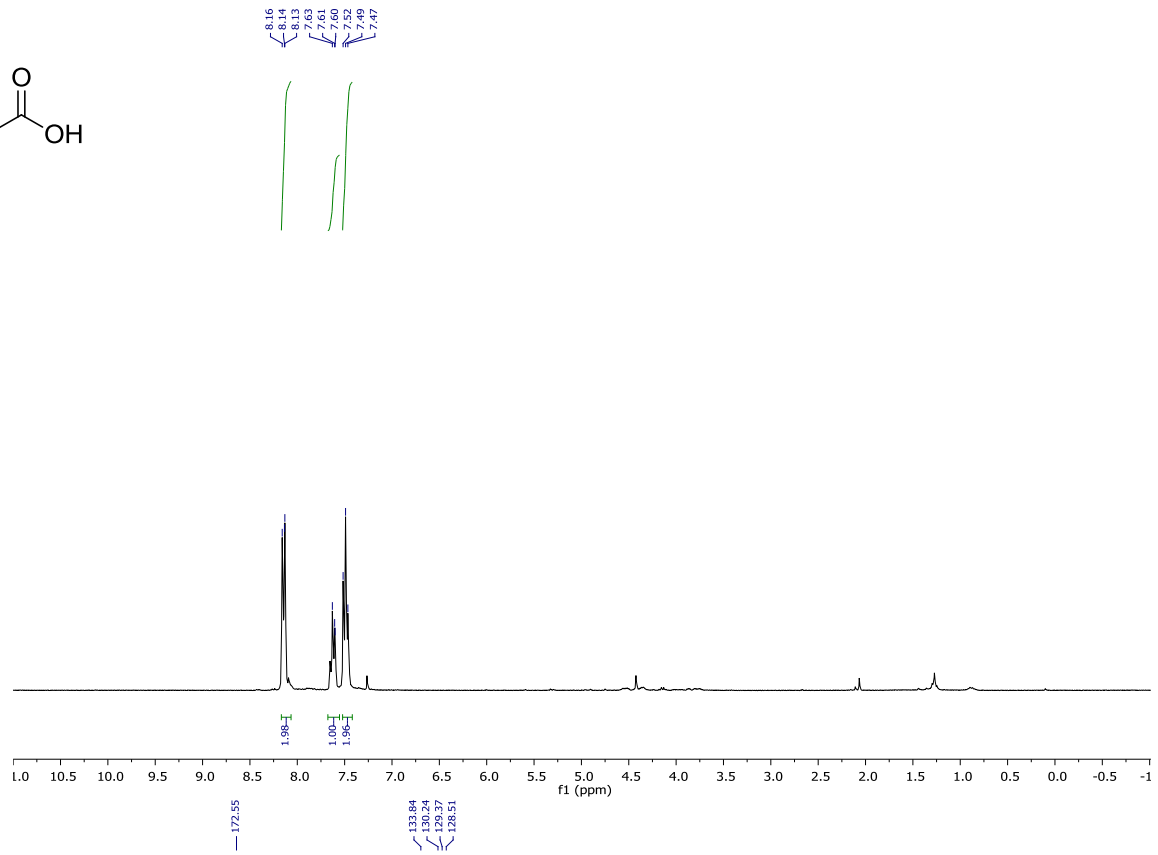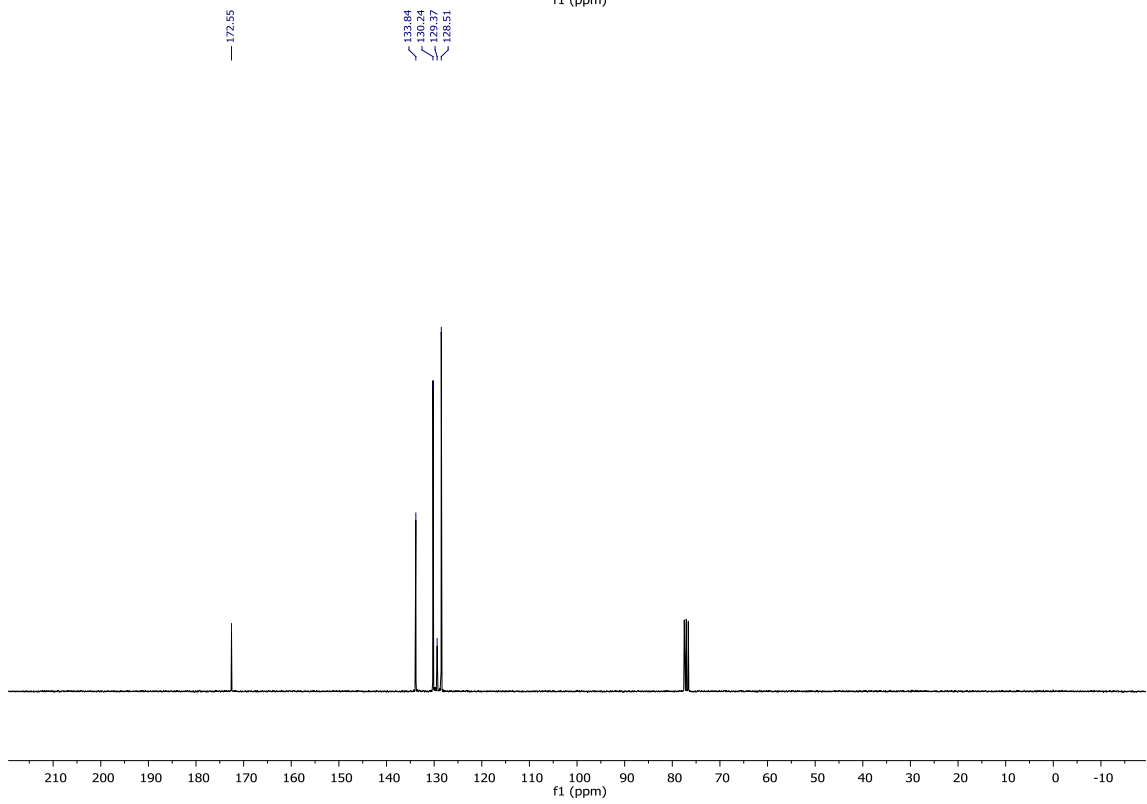

- 4-Isopropylbenzoic acid

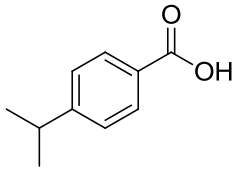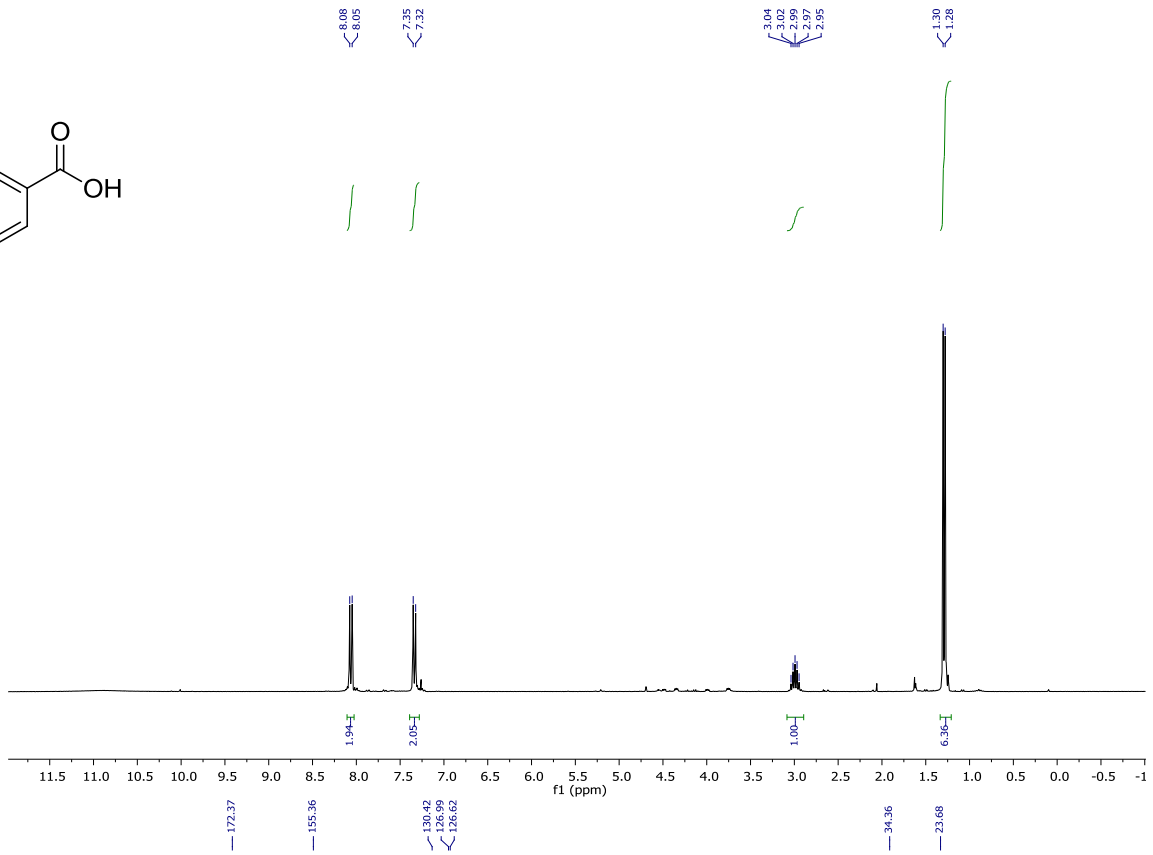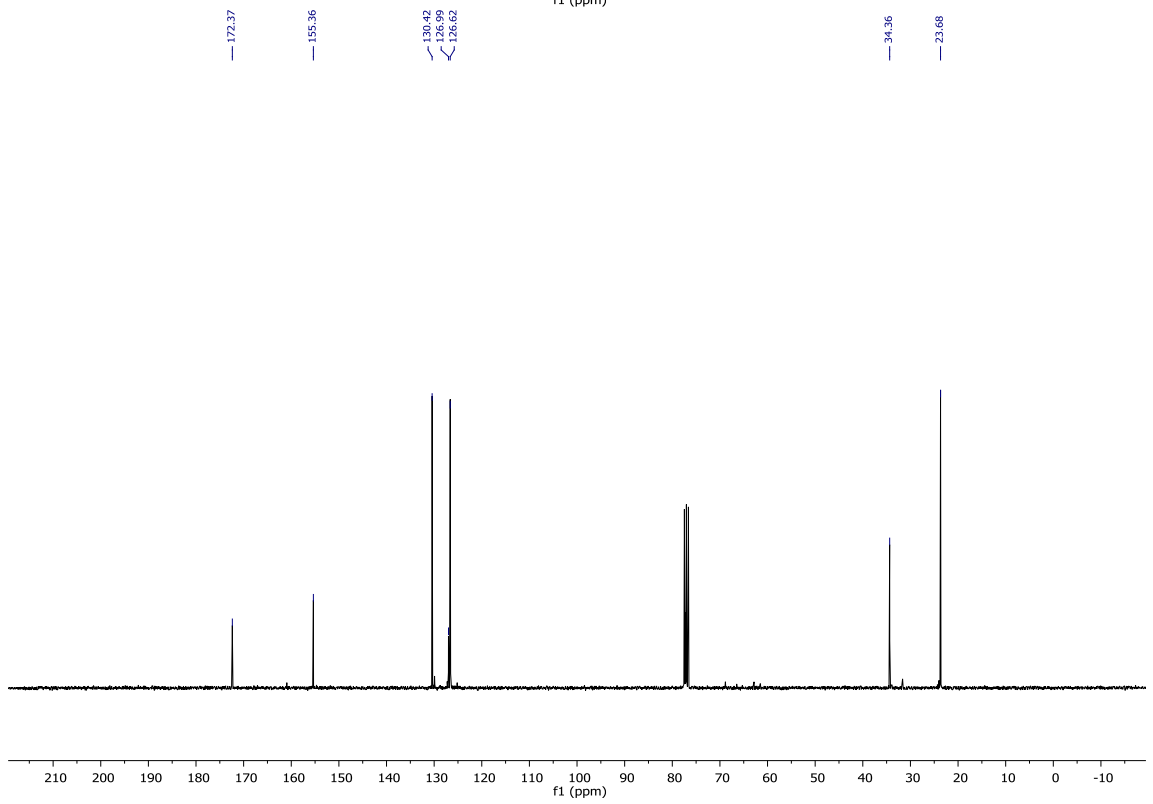

- 4-Ethylbenzoic acid

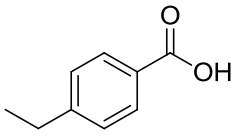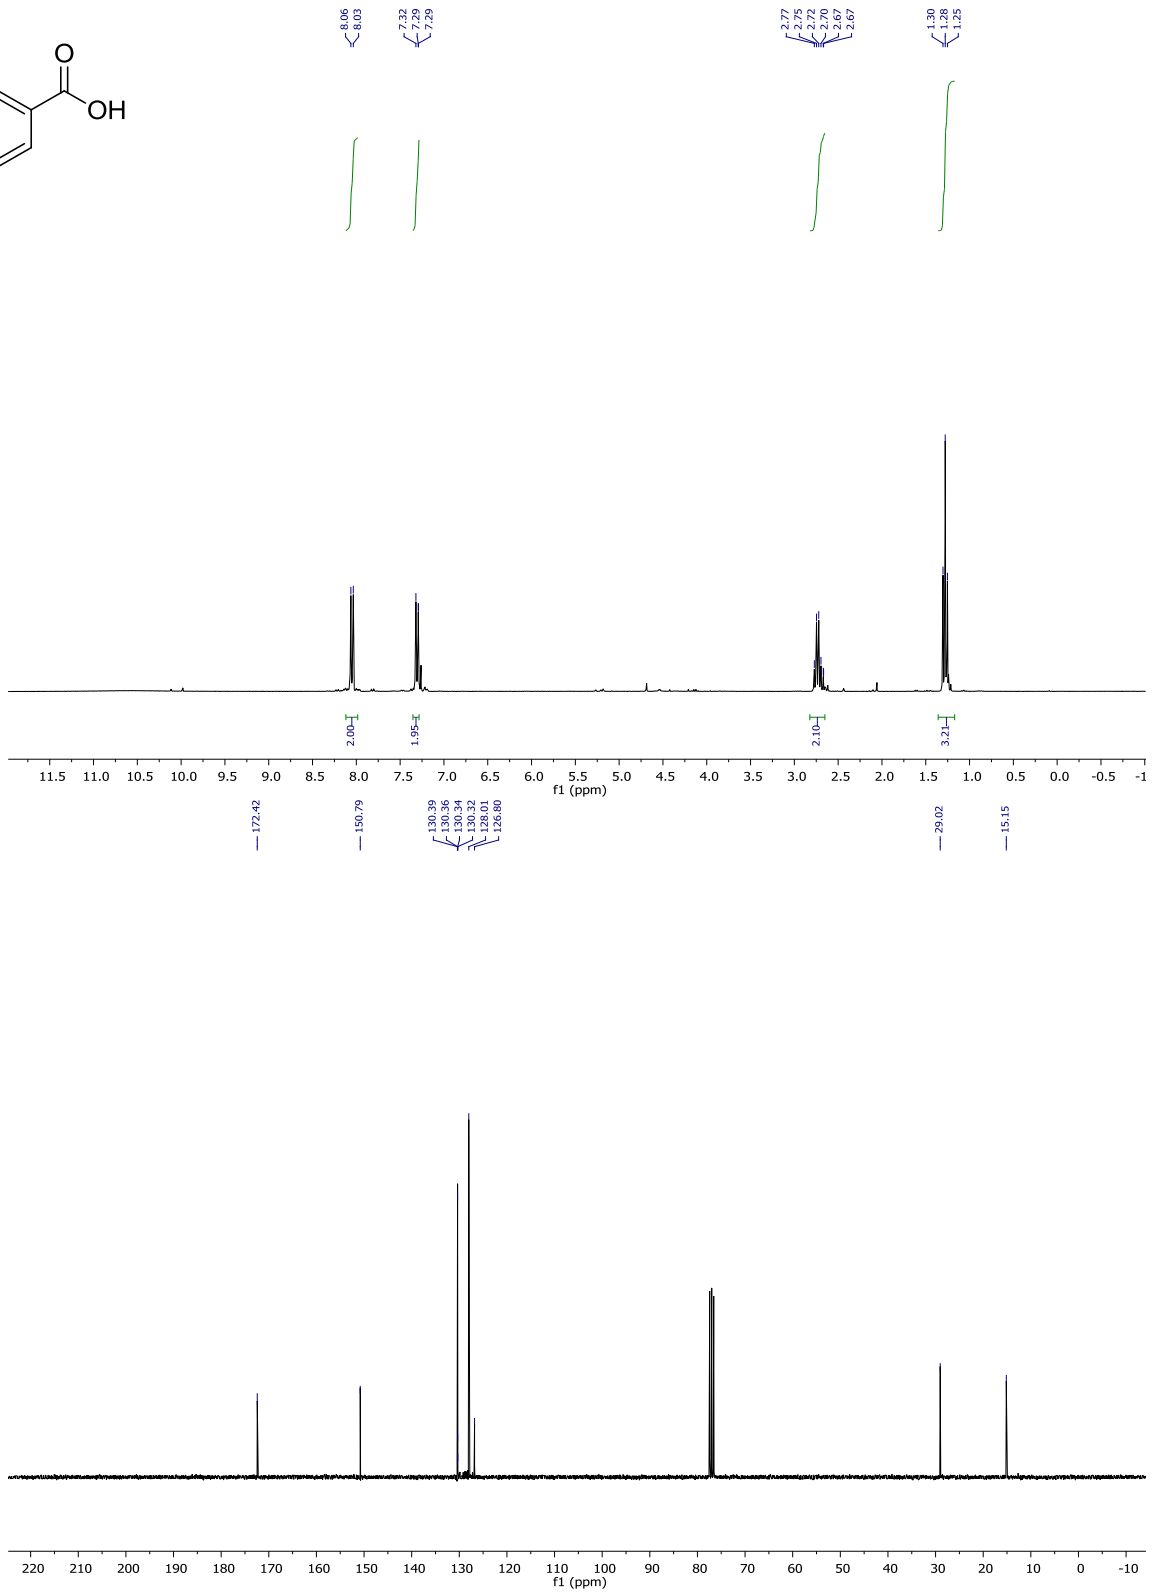

- 4-Methylbenzoic acid

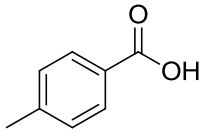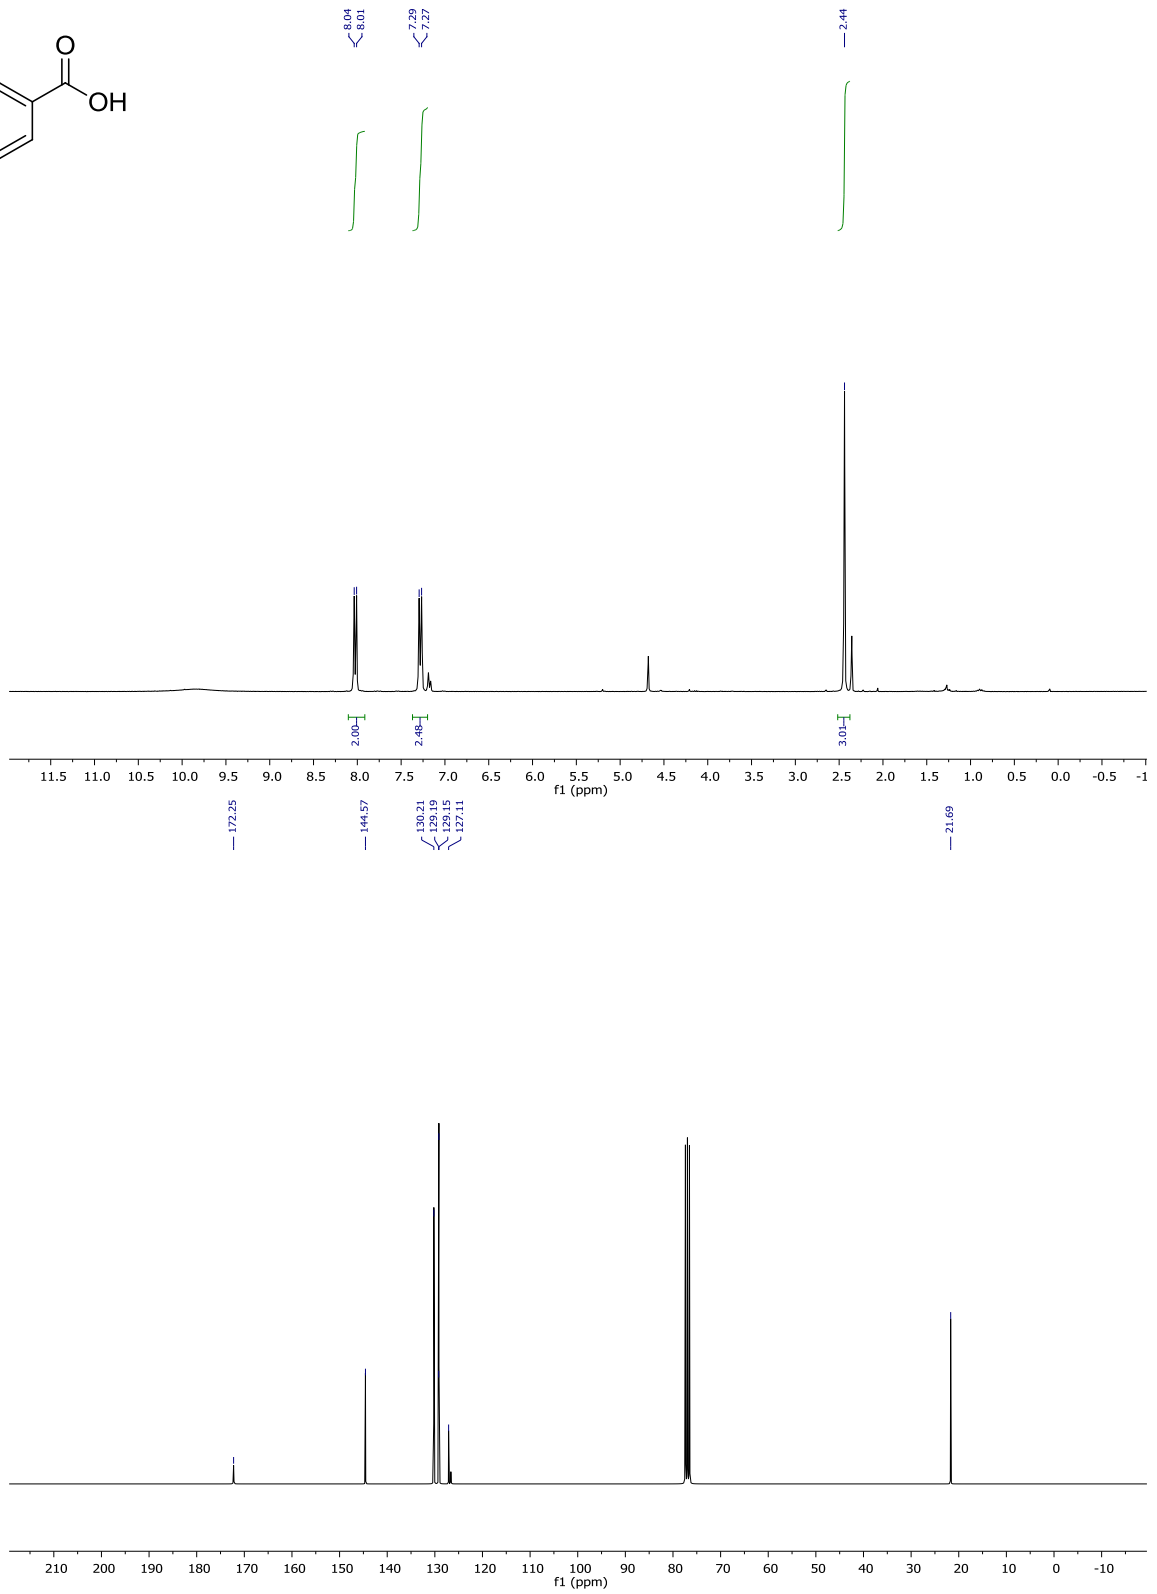

- 4-(Trifluoromethyl)benzoic acid

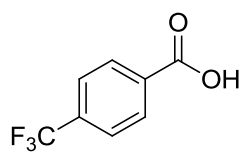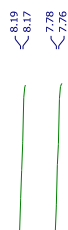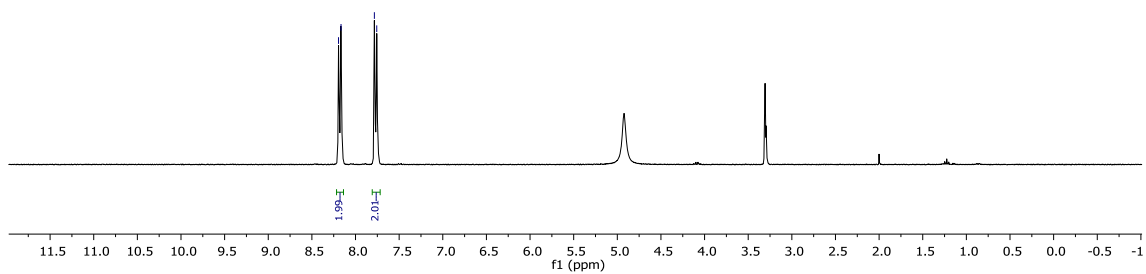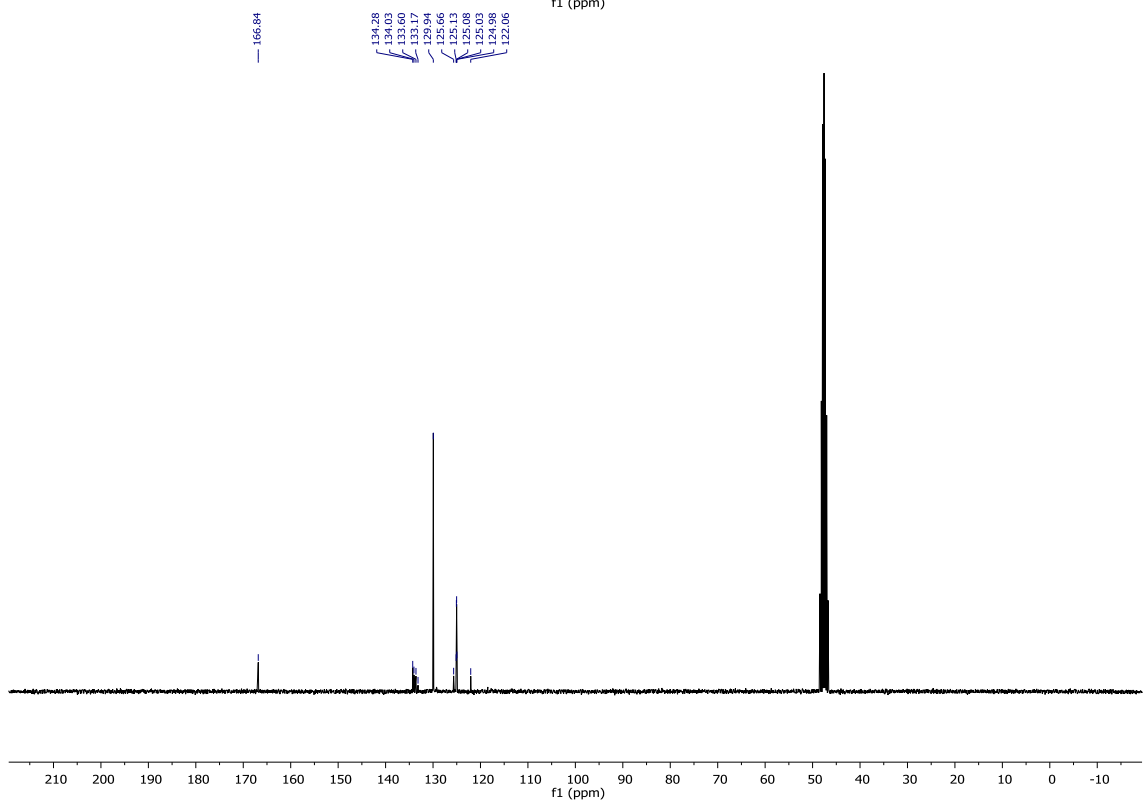



- 3-Phenoxybenzoic acid

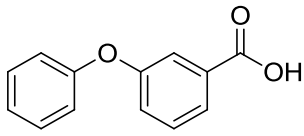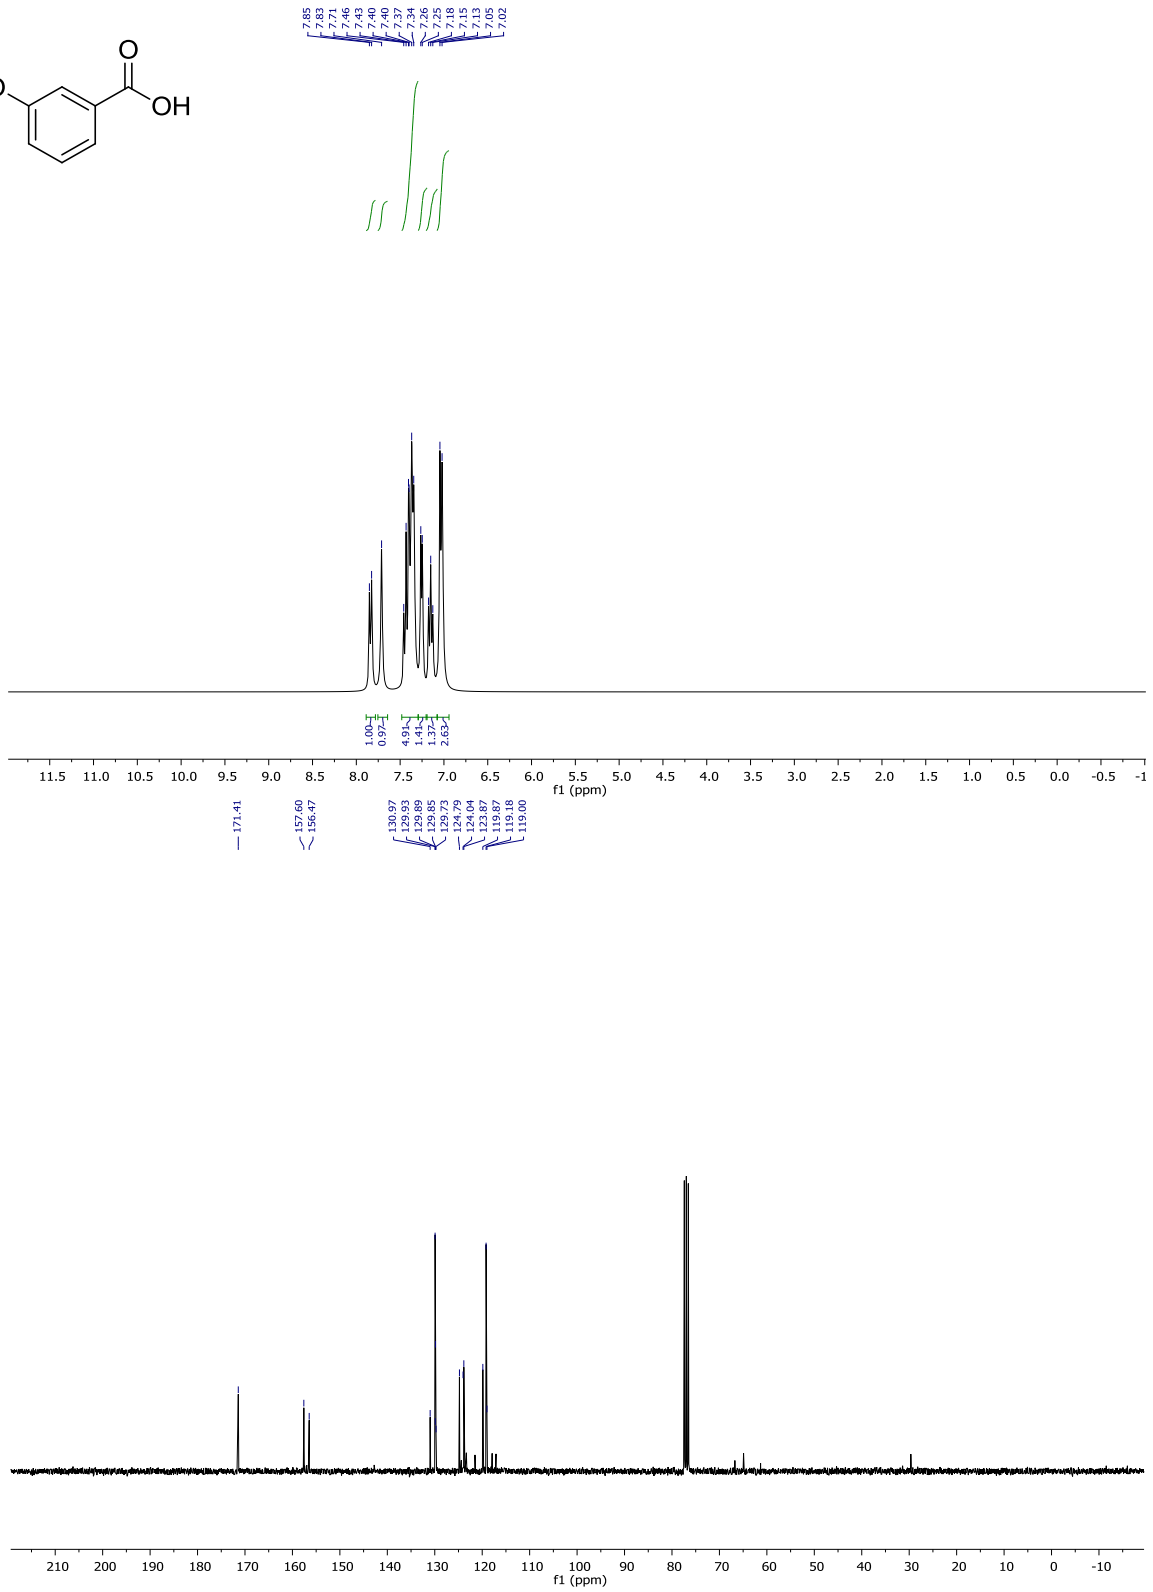

- 3-Methoxybenzoic acid

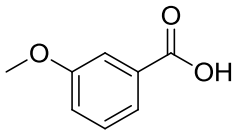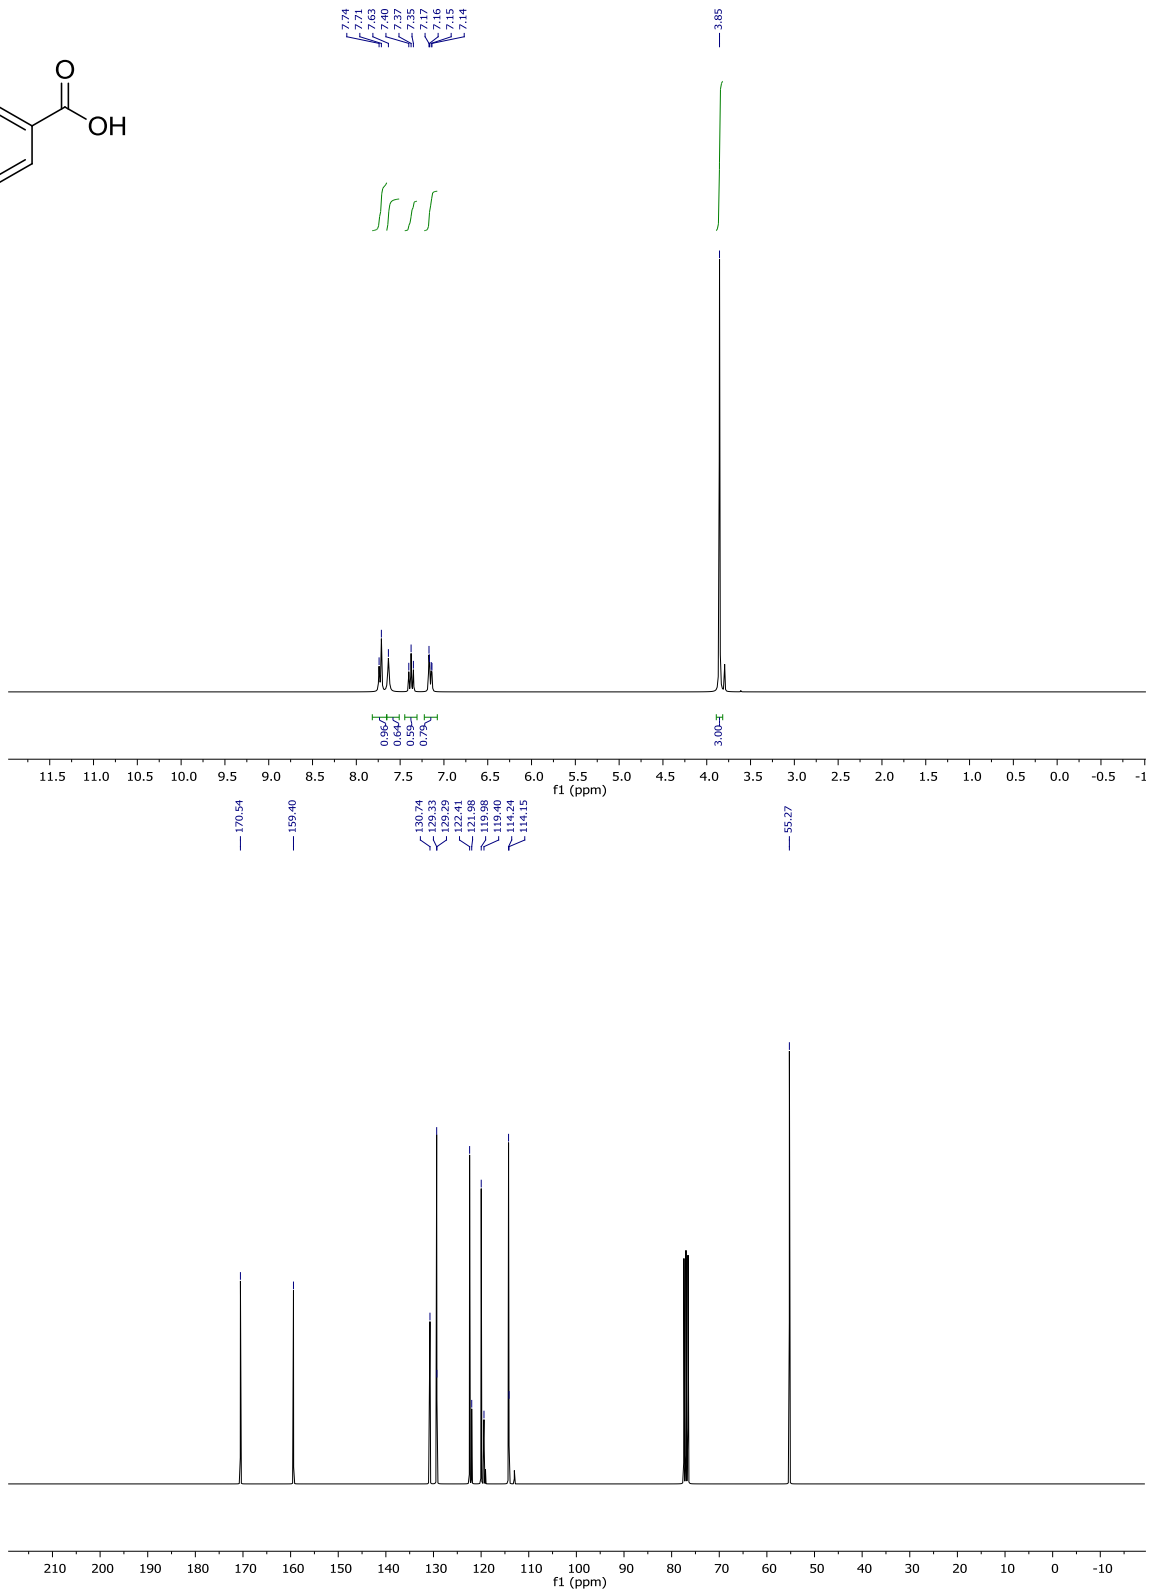

## 10. References

1. R. A. Fallahpour, *Synthesis*, 2000, 1138-1142.
2. F. Churruca, R. SanMartin, B. Inés, I. Tellitu and E. Domínguez, *Adv. Synth. Catal.*, 2006, **348**, 1836-1840.
3. P. Liu, Y. Chen, J. Deng and Y. Tu, *Synthesis*, 2001, **14**, 2078-2080.
4. F. Churruca, R. SanMartin, I. Tellitu and E. Domínguez, *Synlett*, 2005, **20**, 3116-3120.
5. G. Urgoitia, R. SanMartin, M. T. Herrero and E. Domínguez, *Chem Commun.*, 2015, **51**, 4799-4802.
6. M. Kuroboshi, K. Goto and H. Tanaka, *Synthesis*, 2009, **6**, 903-908.
7. N. Lykakis, C. Tanielian, R. Seghrouchni and M. Orfanopoulos, *J. Mol. Catal. A: Chem.*, 2007, **262**, 176-184.
8. Y. A. Ibrahim, K. Kaul and N. A. Al-Awadi, *Tetrahedron*, 2001, **57**, 10171-10176.
9. J. Zhuang, C. Wang, F. Xie and W. Zhang, *Tetrahedron*, 2009, **65**, 9797-9800.
10. M. M. Khodaie, K. Bahrami and F. Shahbazi, *Chem. Lett.*, 2008, **37**, 844-845.
11. X. Q. Wang, W. K. Li and C. Zhang, *Adv. Synth. Catal.*, 2009, **351**, 2342-2350.
12. A. Shaabani and A. Rahmati, *Catal. Comm.*, 2008, **9**, 1692-1697.
13. C. S. Cho, *Catal. Comm.*, 2008, **9**, 2261-2263.
14. Z. Zhishuo and Z. Xiaosong, *Chin. J. Chem.*, 2012, **30**, 1683-1686.
15. S. P. Y. Cutulic, N. J. Findlay, S. Z. Zhou, E. J. T. Chrystal and J. A. Murphy, *J. Org. Chem.*, 2009, **74**, 8713-8718.
16. K. Nemoto, H. Yoshida, N. Egusa, N. Morahashi and T. Hattori, *J. Org. Chem.*, 2010, **75**, 7855-7862.
17. L. Jayasinghe, B. M. M. Kumarihamg, K. H. R. N. Jyarathna, N. W. M. G. Udishani, B. M. R. Bnadara, N. Hara and Y. Fujimoto, *Phytochemistry*, 2003, **62**, 637-641.
18. A. Correa and R. Martín, *J. Am. Chem. Soc.*, 2009, **131**, 15974-15975.
19. D. Yang, H. Yang and H. Fu, *Chem. Commun.*, 2011, **47**, 2348-2350.
